# Supplementary material for: Dual metal organic framework post-synthetic modification; two birds with one stone
Source: Royal Society of Chemistry journal article supplement (doi:10.1039/d4cc04987j), 2024-01-01
Supplement: d4cc04987j1.pdf [file d4cc04987j1.pdf]

## Supplementary Information

# Dual Metal Organic Framework Postsynthetic Modification; Two Birds with One Stone

Sally O. Hunter,<sup>a</sup> Alexandra Nikolich,<sup>a</sup> Macguire R. Bryant,<sup>a</sup> Dayne Skelton<sup>a</sup> and Christopher Richardson\*<sup>a</sup>

<sup>a</sup> School of Chemistry and Molecular Bioscience, Faculty of Science, Medicine and Health, University of Wollongong, Wollongong NSW 2522, Australia

### Table of Contents

|   |                                             |    |
|---|---------------------------------------------|----|
| 1 | General Experimental .....                  | 2  |
| 2 | MOF Synthesis .....                         | 3  |
| 3 | <sup>1</sup> H NMR Digestion Spectra .....  | 5  |
| 4 | Powder X-ray Diffraction Patterns .....     | 18 |
| 5 | TG—DTA Data .....                           | 23 |
| 6 | Gas Adsorption Isotherms and BET Data ..... | 28 |
| 7 | References.....                             | 38 |

## 1 General Experimental

All chemicals used were of analytical grade and purchased from either Sigma Aldrich or Ajax Finechem Pty Ltd. 2-(Propargyloxy)-[1,1-biphenyl]-4,4-dicarboxylic acid ( $H_2L^1$ )<sup>1</sup> and 2-(allyloxy)-[1,1-biphenyl]-4,4-dicarboxylic acid ( $H_2L^2$ )<sup>2</sup> were prepared by reported procedures.

<sup>1</sup>H NMR and <sup>13</sup>C NMR spectra were obtained using a Varian Mercury VX-300-MHz NMR spectrometer, data collection was performed using VNMR 6.1c software on a SUN Solaris 9 operating system operating at 300 MHz for <sup>1</sup>H or a Bruker Ascend NMR spectrometer operating at 400 MHz for <sup>1</sup>H. <sup>1</sup>H NMR spectra were referenced to the residual protio peaks at 2.50 ppm (*d*<sub>6</sub>-DMSO). For <sup>1</sup>H NMR analysis MOF samples (~10 mg) were digested by adding 35% DCl in D<sub>2</sub>O (3 μL) and DMSO (500 μL) and briefly sonicating to aid a homogeneous solution being obtained.

PXRD patterns were obtained using a GBC-MMA X-Ray diffractometer equipped with Visual XRD 122D version 3.04 and Traces version 6.6.10 diffraction screen processing software and accessories. Samples were mounted on 1" SiO<sub>2</sub> substrates and measured using a 2θ angle range of 3-30 with a step size of 0.02° at 1° per minute.

TG-DTA data were obtained using a Shimadzu DTG-60 simultaneous Thermogravimetry and Differential Thermal Analyser, fitted with a FC-60A Flow Rate controller and TA-60WS Thermal Analyser. Measuring parameters of 10 °Cmin<sup>-1</sup> under nitrogen flow (20 cm<sup>3</sup>min<sup>-1</sup>) were used. Data analysis was performed on Ta60 version 2.20 software system. Data were also recorded using a Netzsch STA449F3 instrument with SiC furnace at 10 °Cmin<sup>-1</sup> under N<sub>2</sub> flow at 20 cm<sup>3</sup>min<sup>-1</sup>.

Gas adsorption studies were carried out using a Quantachrome Autosorb MP instrument and high purity nitrogen gas (99.999%) at 77 K. Surface areas were determined using Brunauer–Emmett–Teller (BET) calculations. Samples for gas adsorption were freeze-dried for 1 hour before being heated at 120 °C under vacuum for 5 h to produce activated samples. Freeze-drying was carried out in a Christ Alpha 1–2 LDplus freeze-dryer.

Elemental microanalysis was performed by the Microanalytical Unit at the Australian National University using a Carlo Erba 1106 automatic analyser.

## 2 MOF Synthesis

### *General Procedure for Multivariate MOF synthesis*

H<sub>2</sub>L<sup>1</sup> and H<sub>2</sub>L<sup>2</sup> were weighed out into nine vials according to Table S1. Zn(NO<sub>3</sub>)<sub>2</sub>·6H<sub>2</sub>O (152.3 mg, 0.17 mmol) and DMF (8 cm<sup>3</sup>) were added to each vial. The vials were capped and swirled to dissolve the solids, before being placed in an oven held at 100 °C for 23 hours. The crystals were manipulated to the bottom of each reaction flask and the solvent was replaced with fresh DMF with brief periods of heating at 100 °C (2 × 3 mL), and then exchanged for DCM over a period of a week (4 × 2 mL exchanges). Lastly, the DCM was exchanged for benzene (1 exchange) and then stored under benzene until required. Samples were freeze dried and then heated on the Quantachrome surface area analyser to 120 °C under vacuum and held at that temperature for 5 hours to produce activated samples.

**Table S 1** Quantities of H<sub>2</sub>L<sup>1</sup> and H<sub>2</sub>L<sup>2</sup> used in the multivariate MOF syntheses and yields of air-dried crystals.

| MOF              | H <sub>2</sub> L <sup>1</sup> | H <sub>2</sub> L <sup>2</sup> | Ratio of H <sub>2</sub> L <sup>1</sup> :H <sub>2</sub> L <sup>2</sup> | Mass of air-dried crystals |
|------------------|-------------------------------|-------------------------------|-----------------------------------------------------------------------|----------------------------|
| <b>WUF-44-89</b> | 5.0 mg, 0.017 mmol            | 45.6 mg, 0.153 mmol           | 1:9                                                                   | 26.4 mg                    |
| <b>WUF-44-82</b> | 10.1 mg, 0.034 mmol           | 40.6 mg, 0.136 mmol           | 2:8                                                                   | 24.1 mg                    |
| <b>WUF-44-75</b> | 15.1 mg, 0.051 mmol           | 35.5 mg, 0.119 mmol           | 3:7                                                                   | 24.7 mg                    |
| <b>WUF44-65</b>  | 20.1 mg, 0.068 mmol           | 30.4 mg, 0.102 mmol           | 4:6                                                                   | 24.9 mg                    |
| <b>WUF44-56</b>  | 25.2 mg, 0.085 mmol           | 25.4 mg, 0.085 mmol           | 5:5                                                                   | 26.0 mg                    |
| <b>WUF44-47</b>  | 30.2 mg, 0.102 mmol           | 20.3 mg, 0.068 mmol           | 6:4                                                                   | 24.1 mg                    |
| <b>WUF-44-33</b> | 35.3 mg, 0.119 mmol           | 15.2 mg, 0.051 mmol           | 7:3                                                                   | 23.6 mg                    |
| <b>WUF-44-22</b> | 40.3 mg, 0.136 mmol           | 10.1 mg, 0.034 mmol           | 8:2                                                                   | 23.2 mg                    |
| <b>WUF-44-13</b> | 45.3 mg, 0.153 mmol           | 5.1 mg, 0.017 mmol            | 9:1                                                                   | 24.7 mg                    |

## Microanalytical data

WUF-44-90: Found C, 51.50; H, 3.03; N, 0.00. Calc  $C_{51}H_{38.4}O_{17.5}Zn_4$  |  $[Zn_4O(C_{17}H_{10}O_5)_{0.29}(C_{17}H_{12}O_5)_{2.71}] \cdot 1.5H_2O$  |  $[Zn_4O(L^1)_{0.29}(L^2)_{2.71}] \cdot 1.5H_2O$  C, 51.35; H, 3.25; N, 0.00.

WUF-44-82: Found C, 48.87; H, 2.73; N, 0.00. Calc for  $C_{51}H_{44.9}O_{21}Zn_4$  |  $[Zn_4O(C_{17}H_{10}O_5)_{0.54}(C_{17}H_{12}O_5)_{2.46}] \cdot 5H_2O$  |  $[Zn_4O(L^1)_{0.54}(L^2)_{2.46}] \cdot 5H_2O$  C, 48.79; H, 3.61; N, 0.00.

WUF-44-75: Found C, 51.34; H, 3.09; N, 0.00. Calc  $C_{51}H_{37.5}O_{17.5}Zn_4$  |  $[Zn_4O(C_{17}H_{10}O_5)_{0.76}(C_{17}H_{12}O_5)_{2.24}] \cdot 1.5H_2O$  |  $[Zn_4O(L^1)_{0.76}(L^2)_{2.24}] \cdot 1.5H_2O$  C, 51.37; H, 3.17; N, 0.00.

WUF-44-65: Found C, 51.35; H, 3.03; N, 0.00. Calc for  $C_{51}H_{36.9}O_{17.5}Zn_4$  |  $[Zn_4O(C_{17}H_{10}O_5)_{1.04}(C_{17}H_{12}O_5)_{1.96}] \cdot 1.5H_2O$  |  $[Zn_4O(L^1)_{1.04}(L^2)_{1.96}] \cdot 1.5H_2O$  C, 51.40; H, 3.12; N, 0.00.

WUF-44-56: Found C, 51.02; H, 3.17; N, 0.00. Calc. for  $C_{51}H_{37.4}O_{18}Zn_4$  |  $[Zn_4O(C_{17}H_{10}O_5)_{1.32}(C_{17}H_{12}O_5)_{1.68}] \cdot 2H_2O$  |  $[Zn_4O(L^1)_{1.32}(L^2)_{1.68}] \cdot 2H_2O$  C, 51.06; H, 3.14; N, 0.00.

WUF-44-47: Found C, 51.22; H, 3.26; N, 0.00. Calc. for  $C_{51}H_{36.8}O_{18}Zn_4$  |  $[Zn_4O(C_{17}H_{10}O_5)_{1.58}(C_{17}H_{12}O_5)_{1.42}] \cdot 2H_2O$  |  $[Zn_4O(L^1)_{1.58}(L^2)_{1.42}] \cdot 2H_2O$  C, 51.06; H, 3.10; N, 0.00.

WUF-44-33: Found C, 51.79; H, 3.19; N, 0.00. Calc. for  $C_{51}H_{35}O_{17.5}Zn_4$  |  $[Zn_4O(C_{17}H_{10}O_5)_{1.99}(C_{17}H_{12}O_5)_{1.01}] \cdot 1.5H_2O$  |  $[Zn_4O(L^1)_{1.99}(L^2)_{1.01}] \cdot 1.5H_2O$  C, 51.48; H, 2.97; N, 0.00.

WUF-44-22: Found C, 51.38; H, 3.21; N, 0.00. Calc. for  $C_{51}H_{35.6}O_{18}Zn_4$  |  $[Zn_4O(C_{17}H_{10}O_5)_{2.22}(C_{17}H_{12}O_5)_{0.78}] \cdot 2H_2O$  |  $[Zn_4O(L^1)_{2.22}(L^2)_{0.87}] \cdot 2H_2O$  C, 51.11; H, 2.99; N, 0.00.

WUF-44-13: Found C, 51.81; H, 3.23; N, 0.00. Calc. for  $C_{51}H_{33.5}O_{17.5}Zn_4$  |  $[Zn_4O(C_{17}H_{10}O_5)_{2.75}(C_{17}H_{12}O_5)_{0.25}] \cdot 1.5H_2O$  |  $[Zn_4O(L^1)_{2.75}(L^2)_{0.25}] \cdot 1.5H_2O$  C, 51.55; H, 2.84; N, 0.00.

### 3 <sup>1</sup>H NMR Digestion Spectra

NMR data reported in :  
*Inorg. Chem.*, 2022, **61**, 1136-1144.

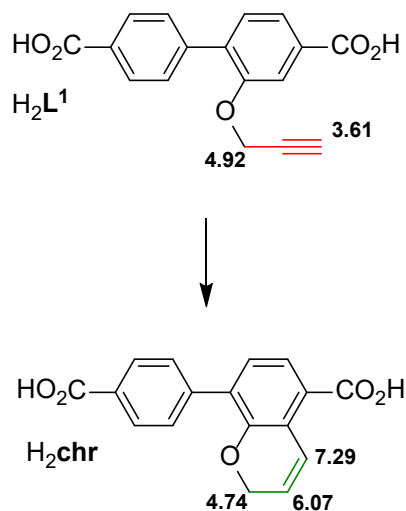

NMR data reported in:  
*Chem. Commun.*, 2013, **49**, 990-992.

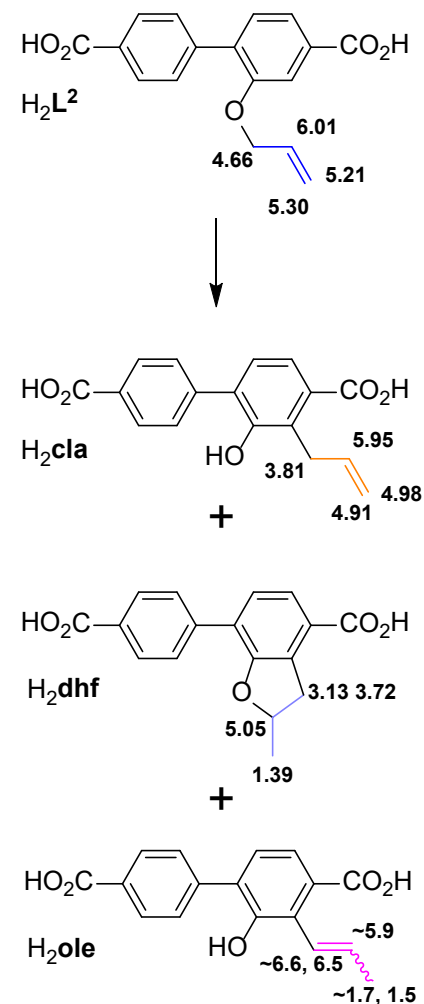

**Figure S 1** <sup>1</sup>H NMR chemical shifts of the tag groups in the linkers. The groups are colour coded here and in the <sup>1</sup>H NMR spectra that follow. The propargyloxy tag group in  $L^1$  linkers give 1 major product under transformation under  $N_2$  gas while 3 major products occur for  $L^2$ . The cyclised product and the internal alkenes are derived from the terminal alkene product. The multiple values for the internal alkene at bottom right is due to *cis*- and *trans*-isomers.

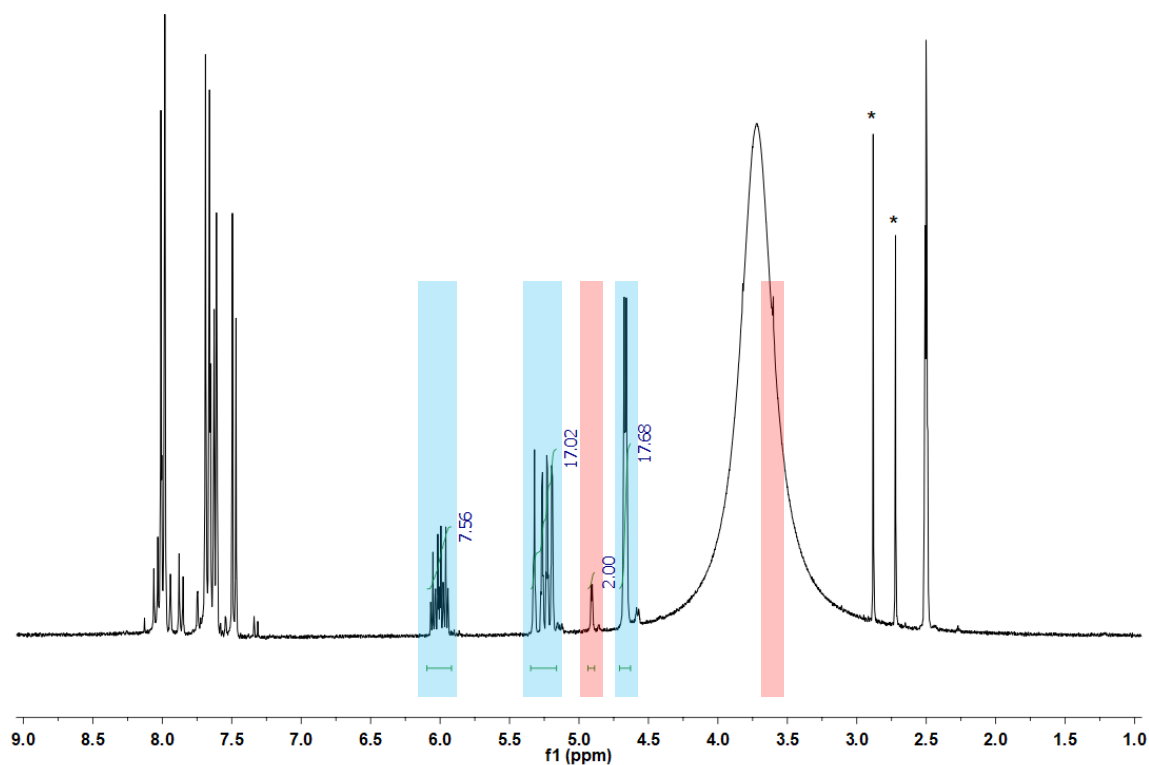

**Figure S 2**  $^1\text{H}$  NMR spectrum in DCl and  $\text{DMSO-}d_6$  solution of WUF-44-89 ( $\text{Zn}_4\text{O}(\text{L}^1)_{0.32}(\text{L}^2)_{2.68}$ ). Spectrum referenced to  $\delta$  2.50 ppm for  $\text{DMSO-}d_6$ . The methyl signals for DMF are marked with an asterisk (\*). The signal for the terminal alkyne of  $\text{L}^1$  ( $\delta$  3.61 ppm) is obscured by the large signal for HOD in these air-dried crystals.

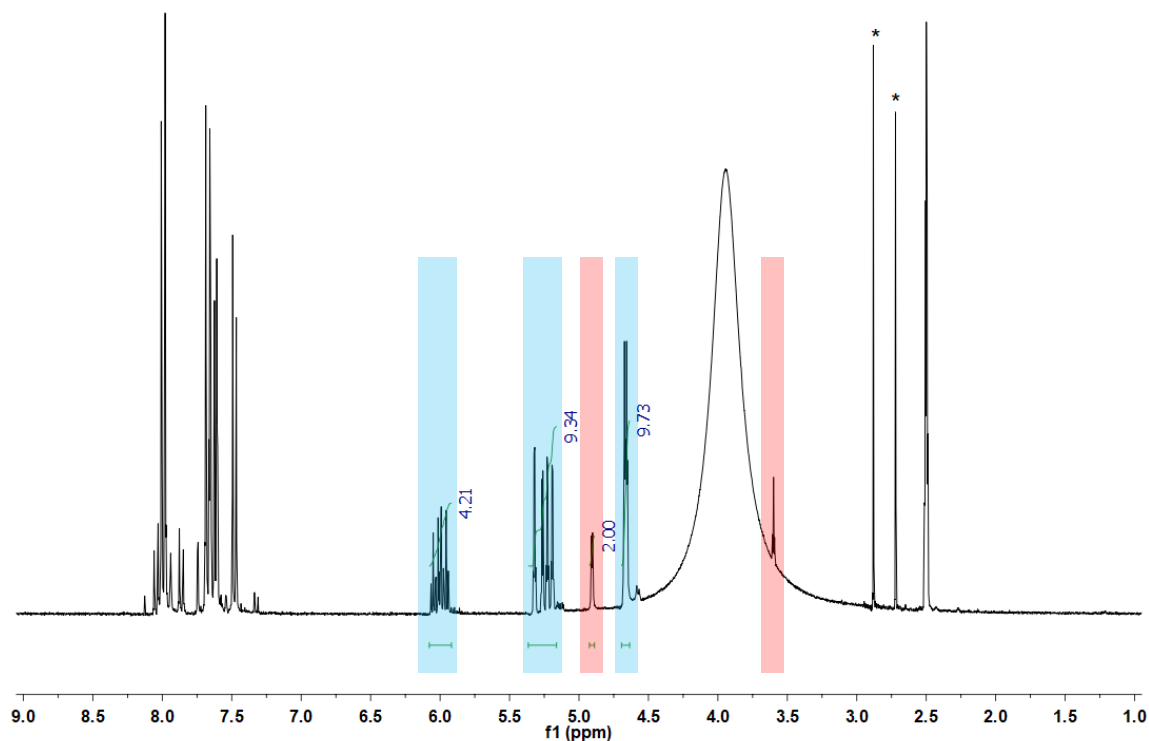

**Figure S 3**  $^1\text{H}$  NMR spectrum in DCl and  $\text{DMSO-}d_6$  solution of WUF-44-82 ( $\text{Zn}_4\text{O}(\text{L}^1)_{0.53}(\text{L}^2)_{2.47}$ ). Spectrum referenced to  $\delta$  2.50 ppm for  $\text{DMSO-}d_6$ . The methyl signals for DMF are marked with an asterisk (\*). The signal for the terminal alkyne of  $\text{L}^1$  ( $\delta$  3.61 ppm) is obscured by the large signal for HOD in these air-dried crystals.

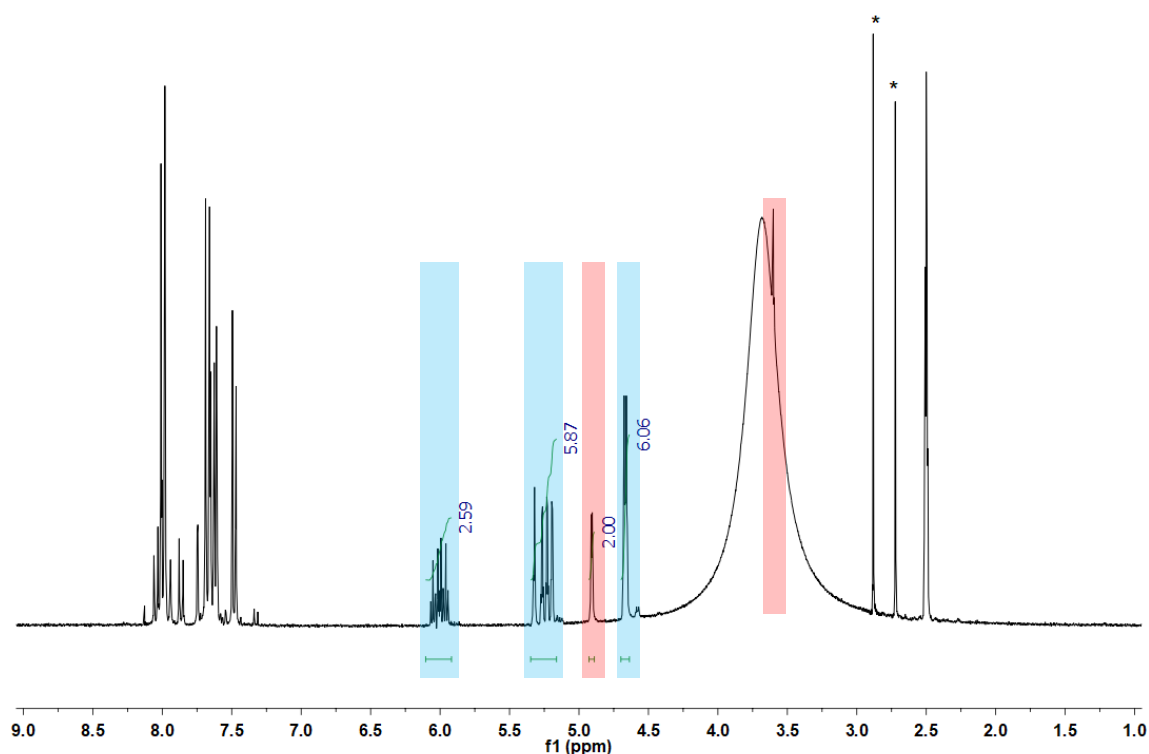

**Figure S 4**  $^1\text{H}$  NMR spectrum in DCl and  $\text{DMSO-}d_6$  solution of WUF-44-75 ( $\text{Zn}_4\text{O}(\text{L}^1)_{0.76}(\text{L}^2)_{2.24}$ ). Spectrum referenced to  $\delta$  2.50 ppm for  $\text{DMSO-}d_6$ . The methyl signals for DMF are marked with an asterisk (\*). The signal for the terminal alkyne of  $\text{L}^1$  ( $\delta$  3.61 ppm) is obscured by the large signal for water in these air-dried crystals.

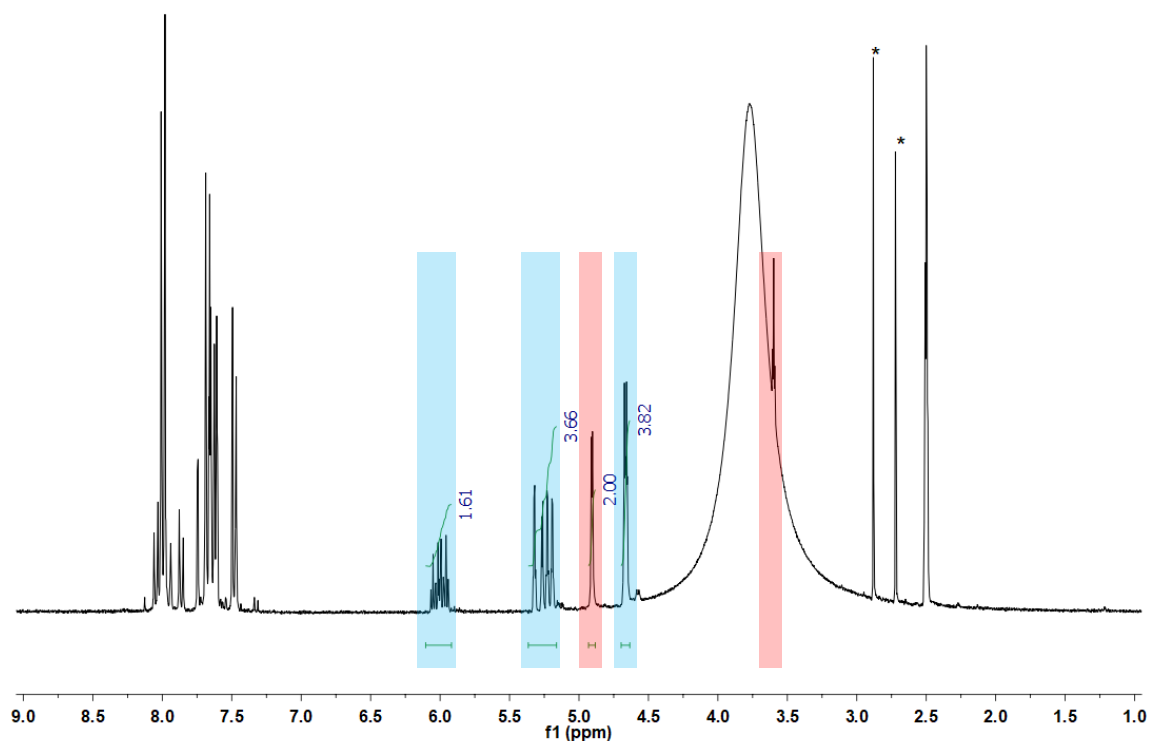

**Figure S 5**  $^1\text{H}$  NMR spectrum in DCl and  $\text{DMSO-}d_6$  solution of WUF-44-65 ( $\text{Zn}_4\text{O}(\text{L}^1)_{1.04}(\text{L}^2)_{1.96}$ ). Spectrum referenced to  $\delta$  2.50 ppm for  $\text{DMSO-}d_6$ . The methyl signals for DMF are marked with an asterisk (\*). The signal for the terminal alkyne of  $\text{L}^1$  ( $\delta$  3.61) is obscured by the large signal for water in these air-dried crystals.

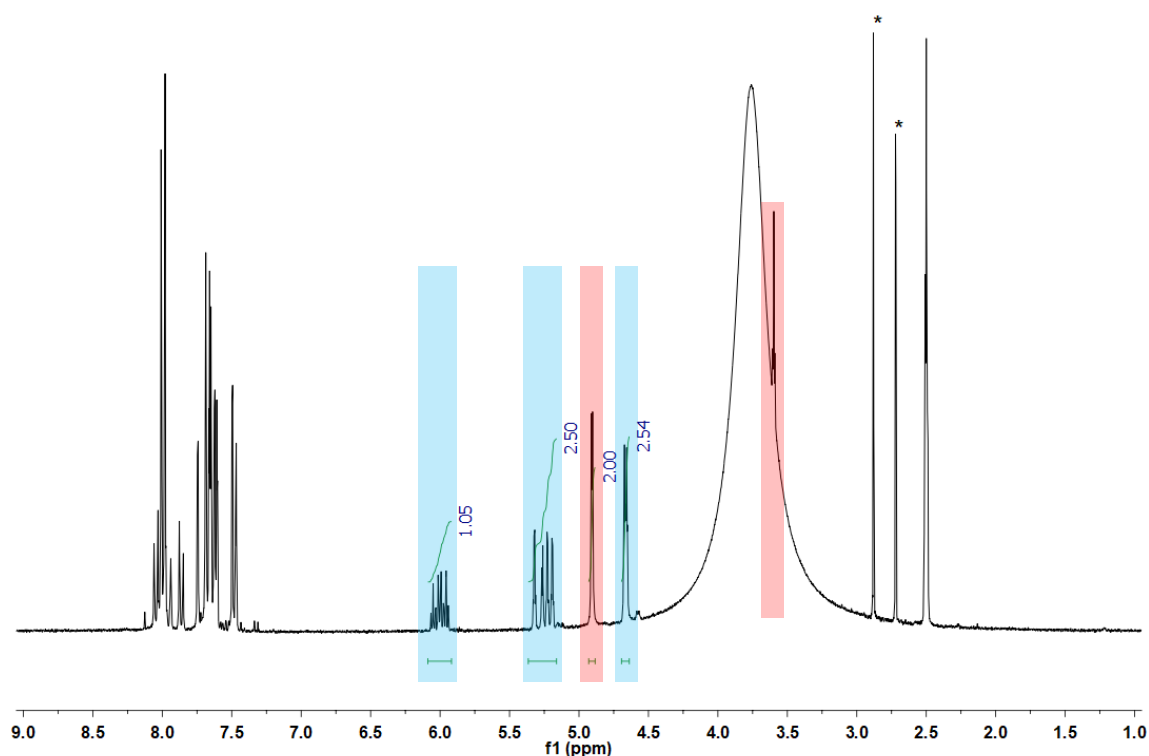

**Figure S 6**  $^1\text{H}$  NMR spectrum in DCl and  $\text{DMSO-}d_6$  solution of WUF-44-56 ( $\text{Zn}_4\text{O}(\text{L}^1)_{1.33}(\text{L}^2)_{1.67}$ ). Spectrum referenced to  $\delta$  2.50 ppm for  $\text{DMSO-}d_6$ . The methyl signals for DMF are marked with an asterisk (\*). The signal for the terminal alkyne of  $\text{L}^1$  ( $\delta$  3.61) is obscured by the large signal for water in these air-dried crystals.

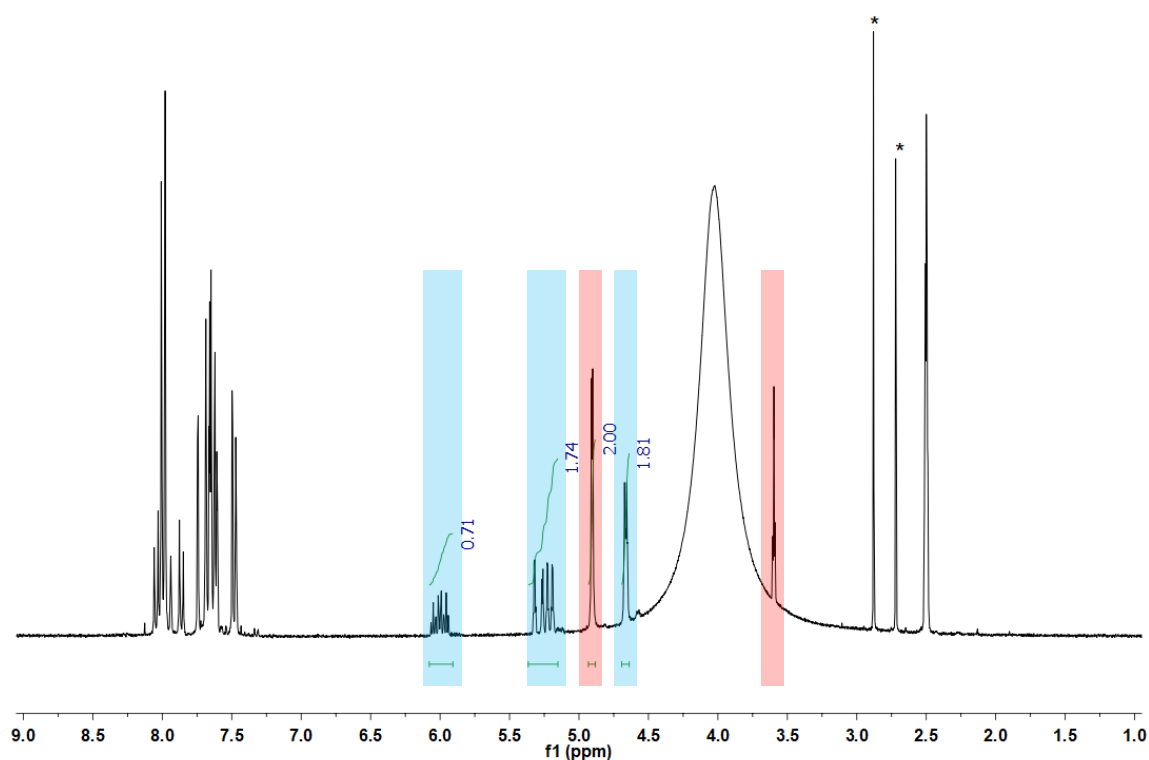

**Figure S 7**  $^1\text{H}$  NMR spectrum in DCl and  $\text{DMSO-}d_6$  solution of WUF-44-47 ( $\text{Zn}_4\text{O}(\text{L}^1)_{1.60}(\text{L}^2)_{1.40}$ ). Spectrum referenced to  $\delta$  2.50 ppm for  $\text{DMSO-}d_6$ . The methyl signals for DMF are marked with an asterisk (\*). The signal for the terminal alkyne of  $\text{L}^1$  ( $\delta$  3.61) is obscured by the large signal for water in these air-dried crystals.



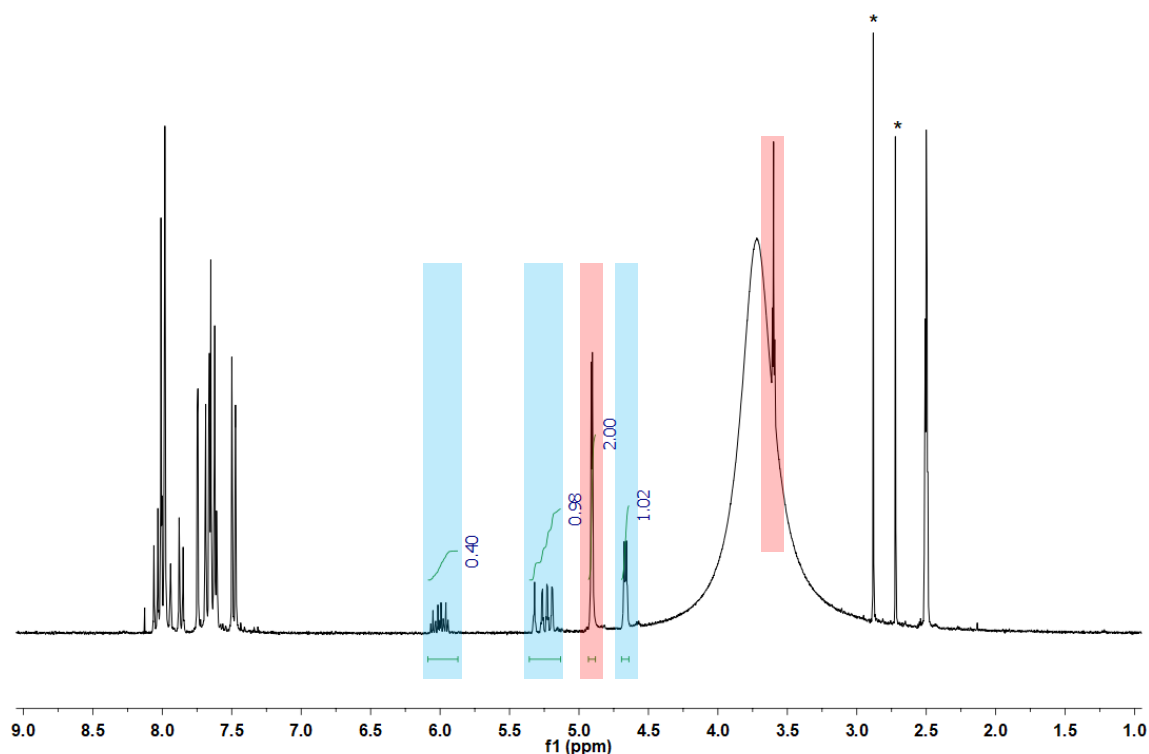

**Figure S 8**  $^1\text{H}$  NMR spectrum in DCI and  $\text{DMSO-}d_6$  solution of WUF-44-33 ( $\text{Zn}_4\text{O}(\text{L}^1)_{2.01}(\text{L}^2)_{0.99}$ ). Spectrum referenced to  $\delta$  2.50 ppm for  $\text{DMSO-}d_6$ . The methyl signals for DMF are marked with an asterisk (\*). The signal for the terminal alkyne of  $\text{L}^1$  ( $\delta$  3.61) is obscured by the large signal for water in these air-dried crystals.

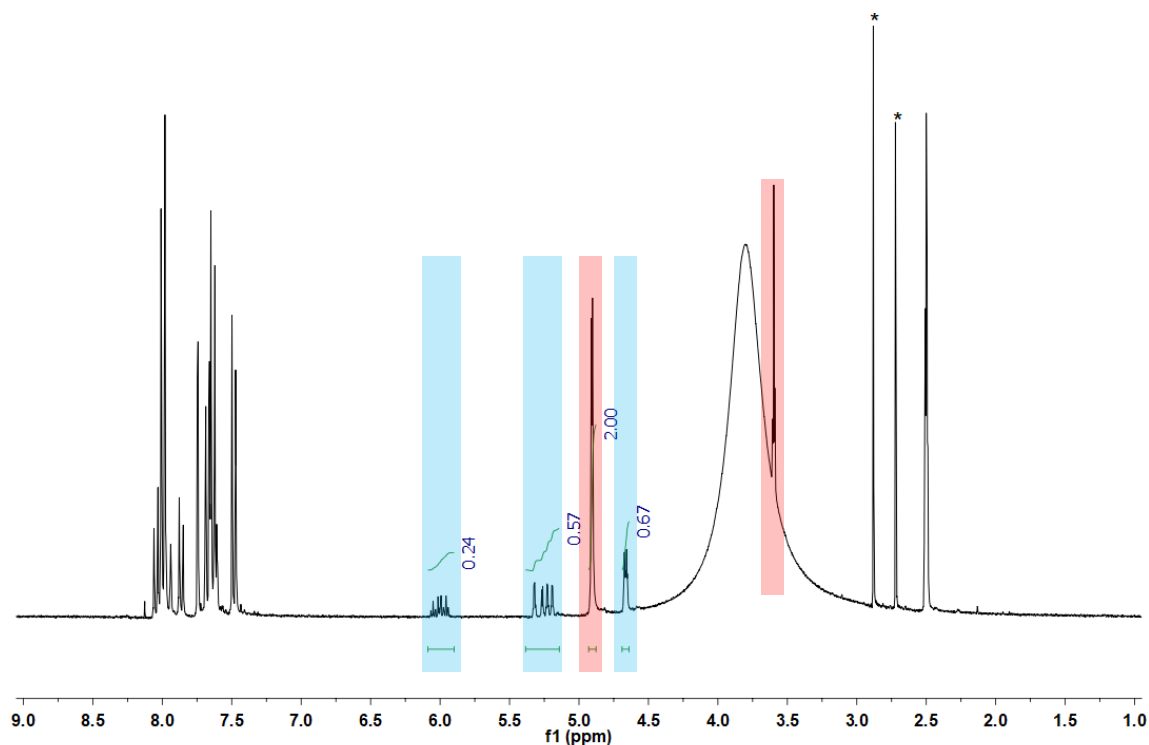

**Figure S 9**  $^1\text{H}$  NMR spectrum in DCI and  $\text{DMSO-}d_6$  solution of WUF-44-22 ( $\text{Zn}_4\text{O}(\text{L}^1)_{2.33}(\text{L}^2)_{0.67}$ ). Spectrum referenced to  $\delta$  2.50 ppm for  $\text{DMSO-}d_6$ . The methyl signals for DMF are marked with an asterisk (\*). The signal for the terminal alkyne of  $\text{L}^1$  ( $\delta$  3.61) is obscured by the large signal for water in these air-dried crystals.

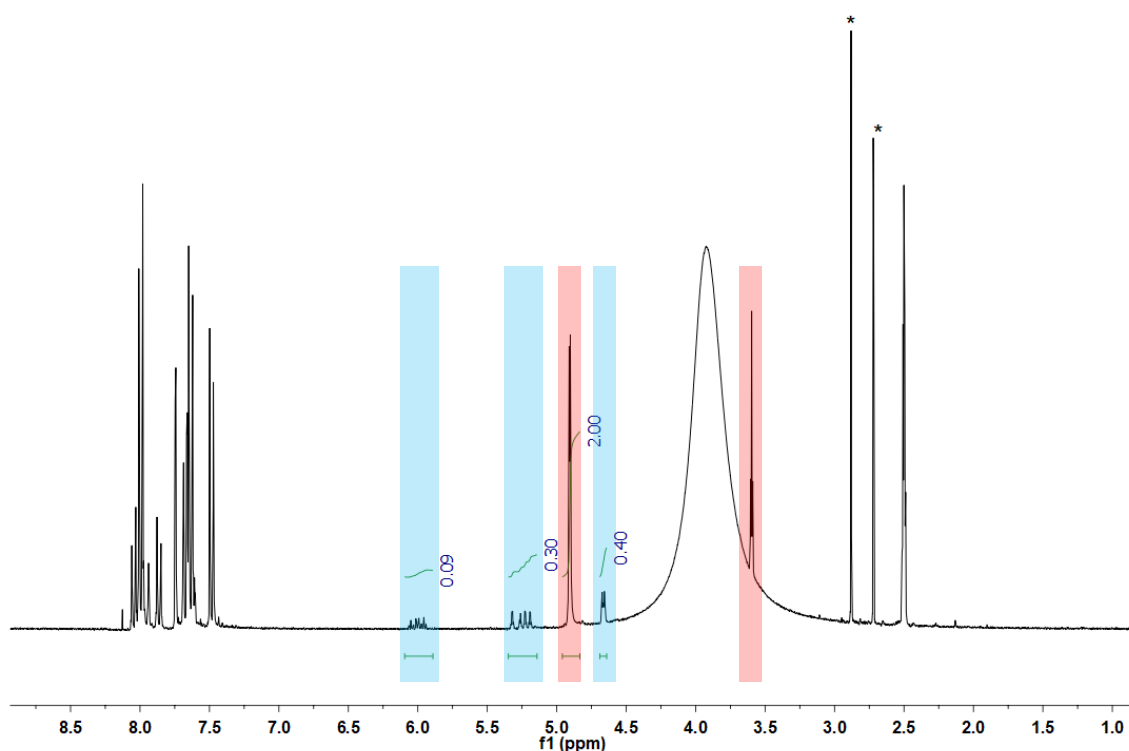

**Figure S 10**  $^1\text{H}$  NMR spectrum in DCI and DMSO- $d_6$  solution of WUF-44-13 ( $\text{Zn}_4\text{O}(\text{L}^1)_{2.61}(\text{L}^2)_{0.39}$ ). Spectrum referenced to  $\delta$  2.50 ppm for DMSO- $d_6$ . The methyl signals for DMF are marked with an asterisk (\*). The signal for the terminal alkyne of  $\text{L}^1$  ( $\delta$  3.61) is obscured by the large signal for water in these air-dried crystals.

**Table S 2** MOF formulas derived from  $^1\text{H}$  NMR data of the digestions of air-dried crystals.

| Propargyl integration | Allyl integration | MOF Formula                                                 | WUF Code  |
|-----------------------|-------------------|-------------------------------------------------------------|-----------|
| 2                     | 17.02             | $\text{Zn}_4\text{O}(\text{L}^1)_{0.32}(\text{L}^2)_{2.68}$ | WUF-44-89 |
| 2                     | 9.34              | $\text{Zn}_4\text{O}(\text{L}^1)_{0.53}(\text{L}^2)_{2.47}$ | WUF-44-82 |
| 2                     | 5.87              | $\text{Zn}_4\text{O}(\text{L}^1)_{0.76}(\text{L}^2)_{2.24}$ | WUF-44-75 |
| 2                     | 3.66              | $\text{Zn}_4\text{O}(\text{L}^1)_{1.06}(\text{L}^2)_{1.94}$ | WUF-44-65 |
| 2                     | 2.50              | $\text{Zn}_4\text{O}(\text{L}^1)_{1.33}(\text{L}^2)_{1.67}$ | WUF-44-56 |
| 2                     | 1.74              | $\text{Zn}_4\text{O}(\text{L}^1)_{1.60}(\text{L}^2)_{1.40}$ | WUF-44-47 |
| 2                     | 0.98              | $\text{Zn}_4\text{O}(\text{L}^1)_{2.01}(\text{L}^2)_{0.99}$ | WUF-44-33 |
| 2                     | 0.57              | $\text{Zn}_4\text{O}(\text{L}^1)_{2.33}(\text{L}^2)_{0.67}$ | WUF-44-22 |
| 2                     | 0.30              | $\text{Zn}_4\text{O}(\text{L}^1)_{2.61}(\text{L}^2)_{0.39}$ | WUF-44-13 |

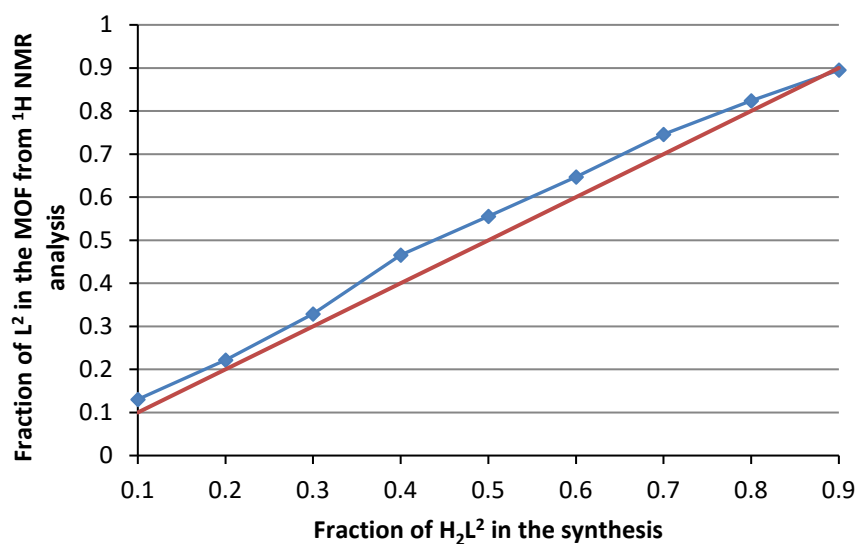

**Figure S 11** A plot of L<sup>2</sup> incorporation in the MOFs. The red line is provided to guide the eye for what would be expected if the incorporation matched the synthesis fraction.

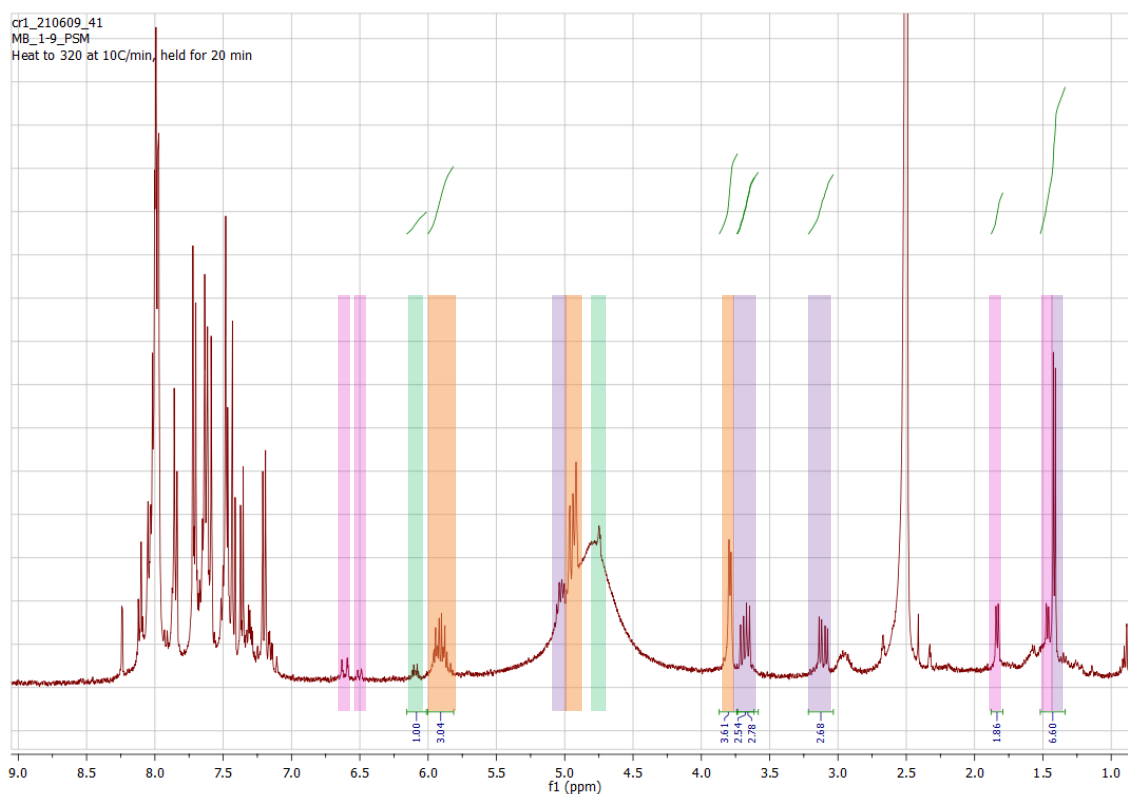

**Figure S 12** <sup>1</sup>H NMR spectrum in DCI and DMSO-*d*<sub>6</sub> solution (reference δ 2.50 ppm) of WUF-44-90PSM. The large broad signal centred around 4.75 ppm is the HOD signal. There are no signals for L<sup>1</sup> (4.92 -CH<sub>2</sub>; 3.61-CH) and L<sup>2</sup> (4.66 -CH<sub>2</sub>; 6.01-CH; 5.21/5.30 =CH<sub>2</sub>) linkers meaning the reactions have been driven to completion. The colour codes for products are given in Figure S1.

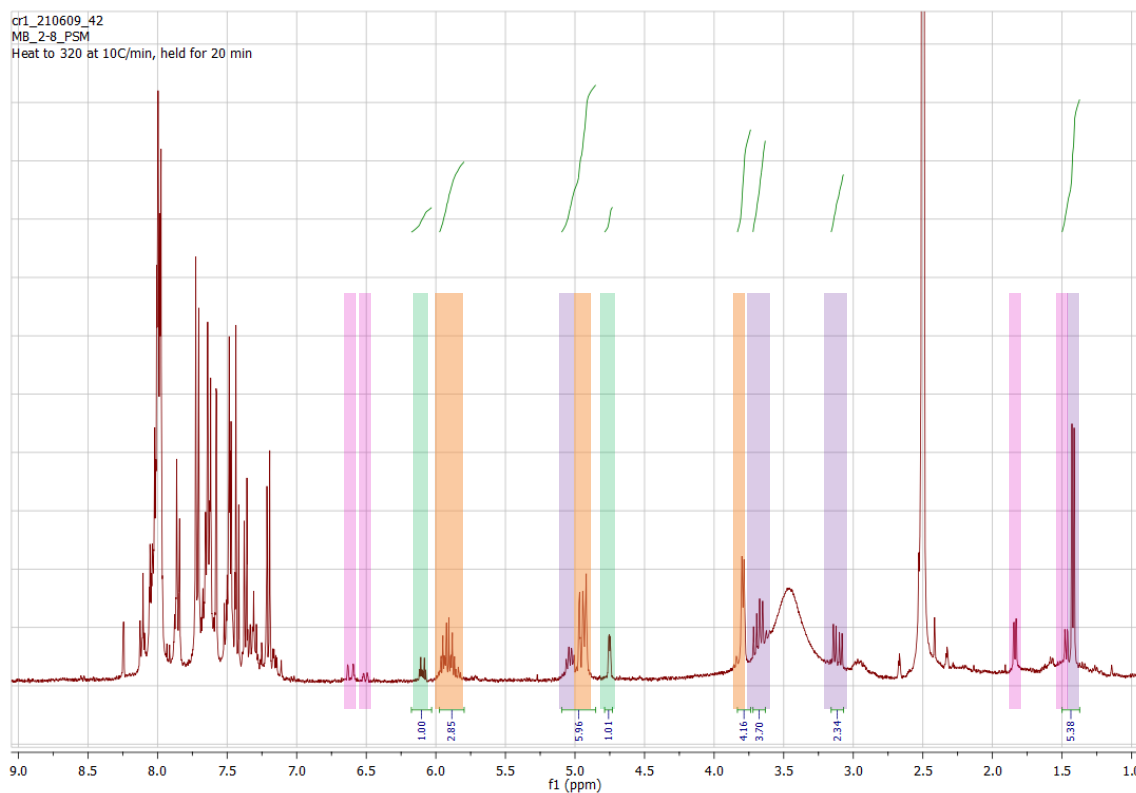

**Figure S 13**  $^1\text{H}$  NMR spectrum in DCI and  $\text{DMSO-}d_6$  solution (reference  $\delta$  2.50 ppm) of WUF-44-82PSM. The large broad signal centred around 3.5 ppm is the HOD signal. There are no signals for  $\text{L}^1$  (4.92 - $\text{CH}_2$ ; 3.61- $\text{CH}$ ) and  $\text{L}^2$  (4.66 - $\text{CH}_2$ ; 6.01- $\text{CH}$ ; 5.21/5.30 = $\text{CH}_2$ ) linkers meaning the reactions have been driven to completion. The colour codes for products are given in Figure S1.

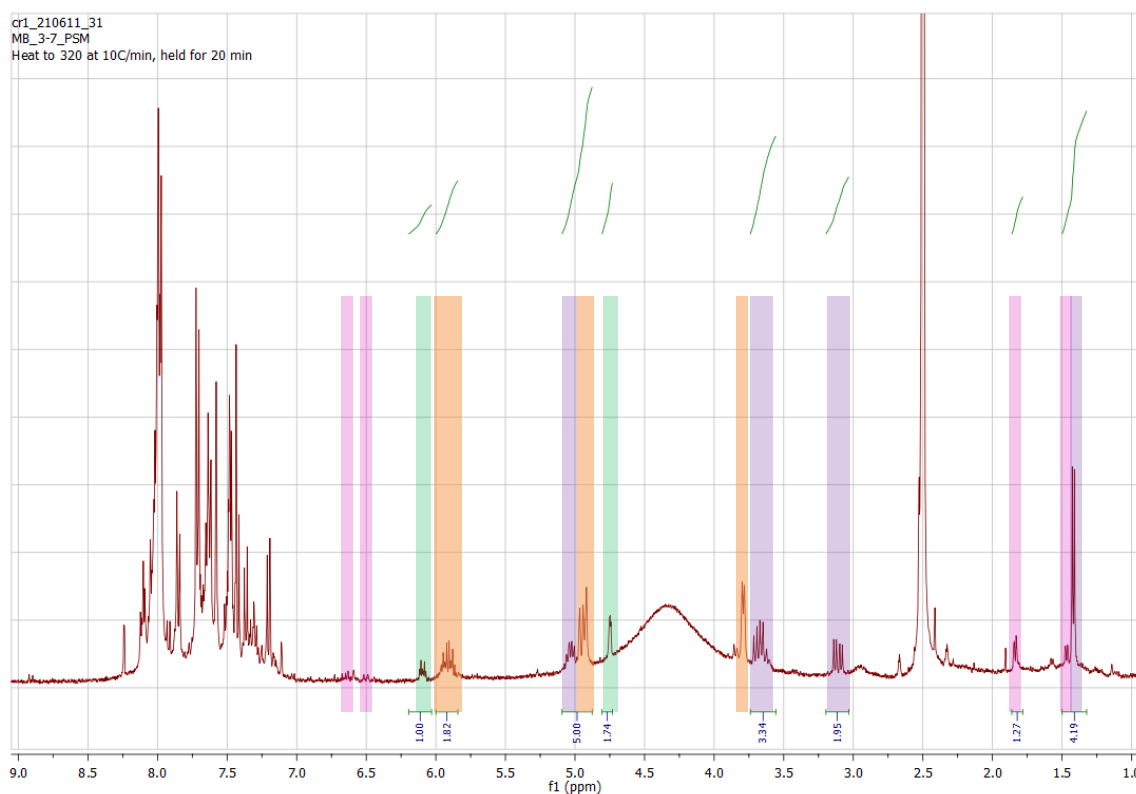

**Figure S 14**  $^1\text{H}$  NMR spectrum in DCI and  $\text{DMSO-}d_6$  (reference  $\delta$  2.50 ppm) solution of WUF-44-75PSM. The large broad signal centred around 4.25 ppm is the HOD signal. There are no signals for  $\text{L}^1$  (4.92 - $\text{CH}_2$ ; 3.61- $\text{CH}$ ) and  $\text{L}^2$  (4.66 - $\text{CH}_2$ ; 6.01- $\text{CH}$ ; 5.21/5.30 = $\text{CH}_2$ ) linkers meaning the reactions have been driven to completion. The colour codes for products are given in Figure S1.

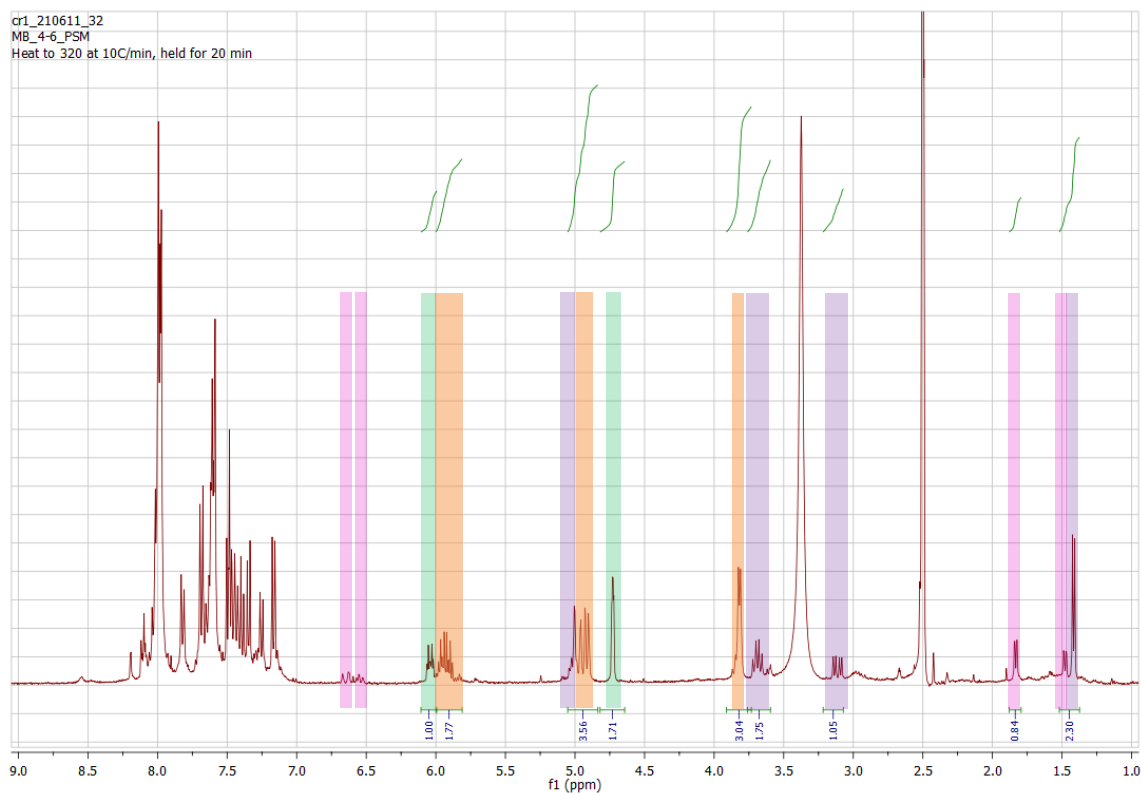

**Figure S 15**  $^1\text{H}$  NMR spectrum in DCI and DMSO- $d_6$  (reference  $\delta$  2.50 ppm) solution of WUF-44-65PSM. Spectrum referenced to  $\delta$  2.50 ppm for DMSO- $d_6$ . The large signal centred around 3.3 ppm is the HOD signal. There are no signals for **L**<sup>1</sup> (4.92 - $\text{CH}_2$ ; 3.61- $\text{CH}$ ) and **L**<sup>2</sup> (4.66 - $\text{CH}_2$ ; 6.01- $\text{CH}$ ; 5.21/5.30 = $\text{CH}_2$ ) linkers meaning the reactions have been driven to completion. The colour codes for products are given in Figure S1.

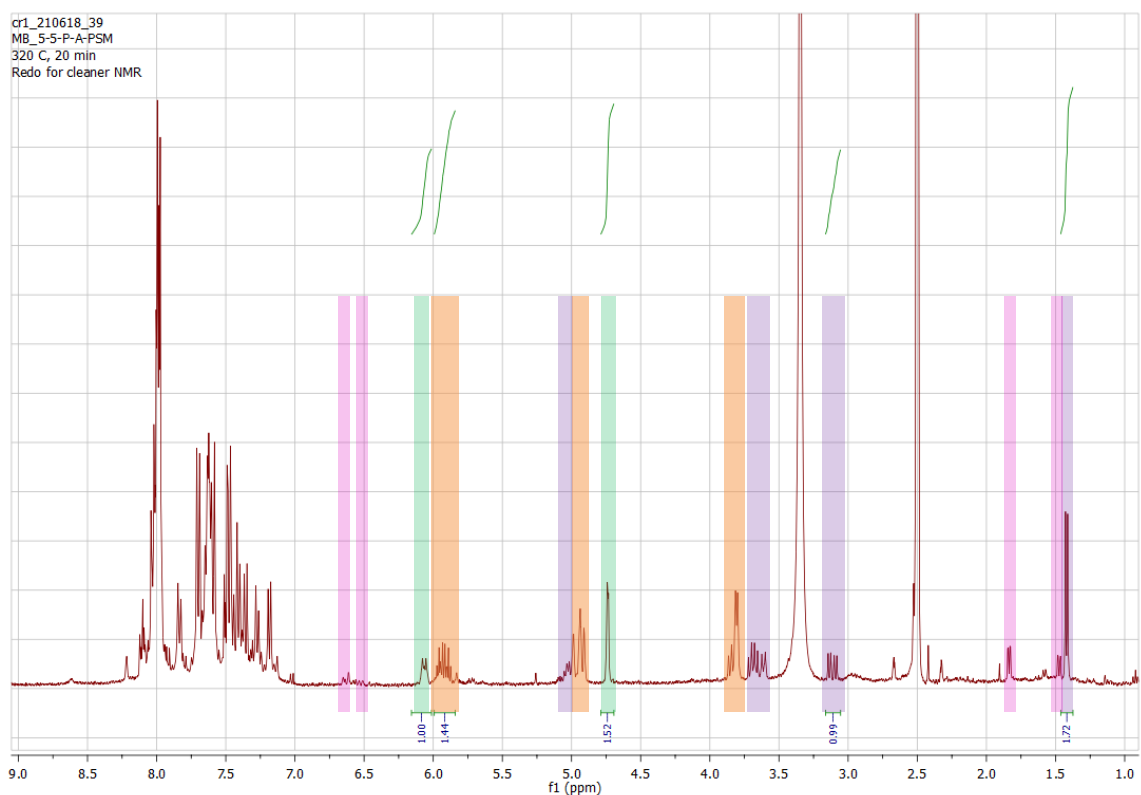

**Figure S 16**  $^1\text{H}$  NMR spectrum in DCI and DMSO- $d_6$  (reference  $\delta$  2.50 ppm) solution of WUF-44-56PSM. The large signal centred around 3.3 ppm is the HOD signal. There are no signals for **L**<sup>1</sup> (4.92 - $\text{CH}_2$ ; 3.61- $\text{CH}$ ) and **L**<sup>2</sup> (4.66 - $\text{CH}_2$ ; 6.01- $\text{CH}$ ; 5.21/5.30 = $\text{CH}_2$ ) linkers meaning the reactions have been driven to completion. The colour codes for products are given in Figure S1.

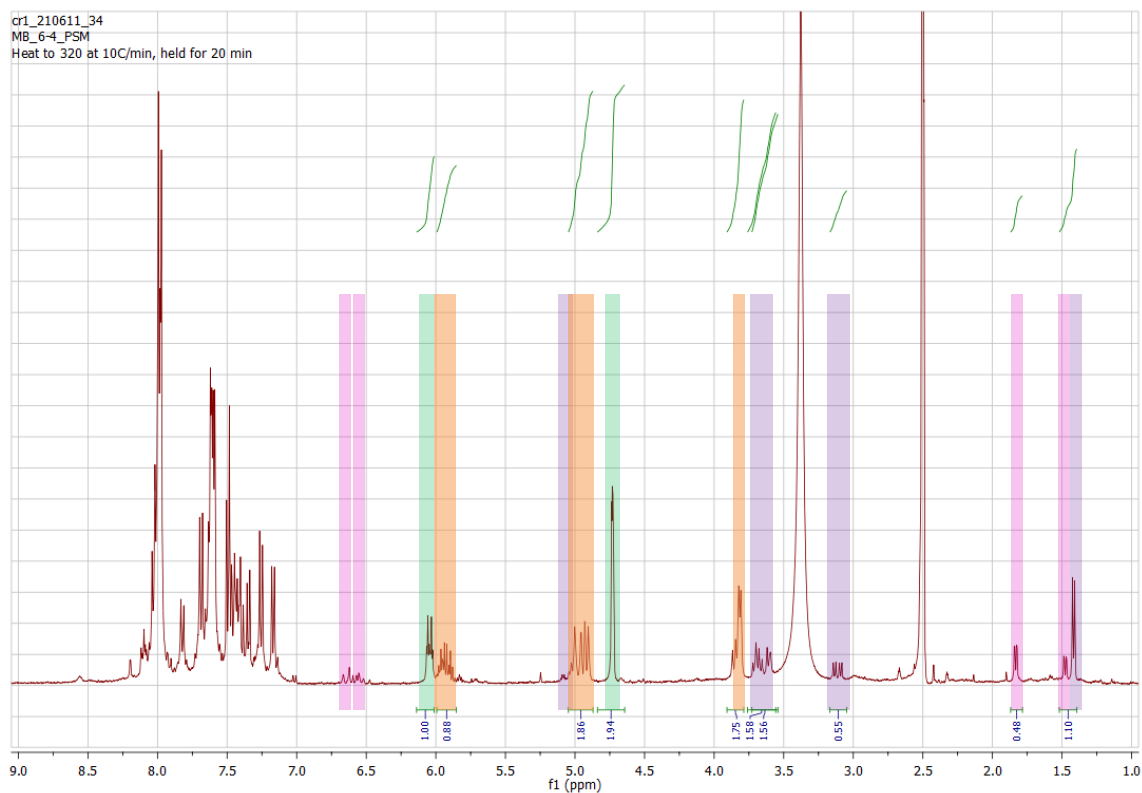

**Figure S 17**  $^1\text{H}$  NMR spectrum in DCI and  $\text{DMSO-}d_6$  (reference  $\delta$  2.50 ppm) solution of WUF-44-47PSM. The large broad signal centred around 3.3 ppm is the HOD signal. There are no signals for **L<sup>1</sup>** (4.92 - $\text{CH}_2$ ; 3.61- $\text{CH}$ ) and **L<sup>2</sup>** (4.66 - $\text{CH}_2$ ; 6.01- $\text{CH}$ ; 5.21/5.30 = $\text{CH}_2$ ) linkers meaning the reactions have been driven to completion.

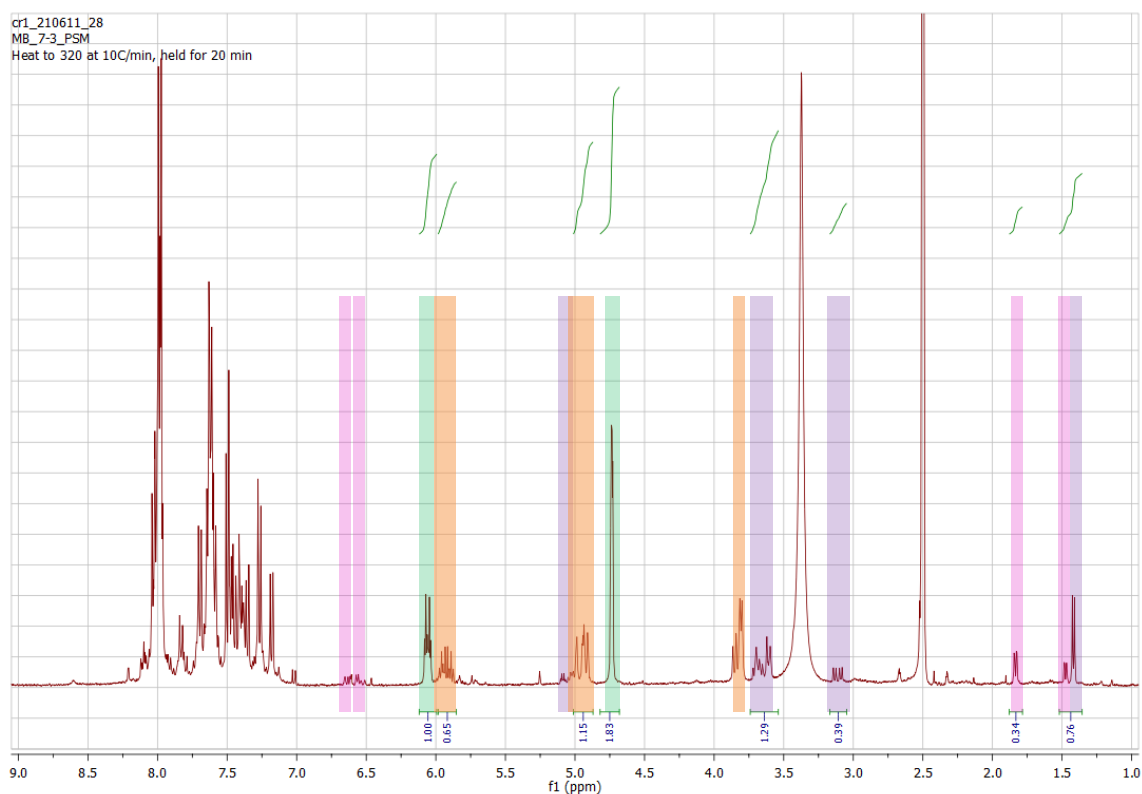

**Figure S 18**  $^1\text{H}$  NMR spectrum in DCI and  $\text{DMSO-}d_6$  solution of WUF-44-34PSM. The large broad signal centred around 3.3 ppm is the HOD signal. There are no signals for **L<sup>1</sup>** (4.92 - $\text{CH}_2$ ; 3.61- $\text{CH}$ ) and **L<sup>2</sup>** (4.66 - $\text{CH}_2$ ; 6.01- $\text{CH}$ ; 5.21/5.30 = $\text{CH}_2$ ) linkers meaning the reactions have been driven to completion. The colour codes for products are given in Figure S1.

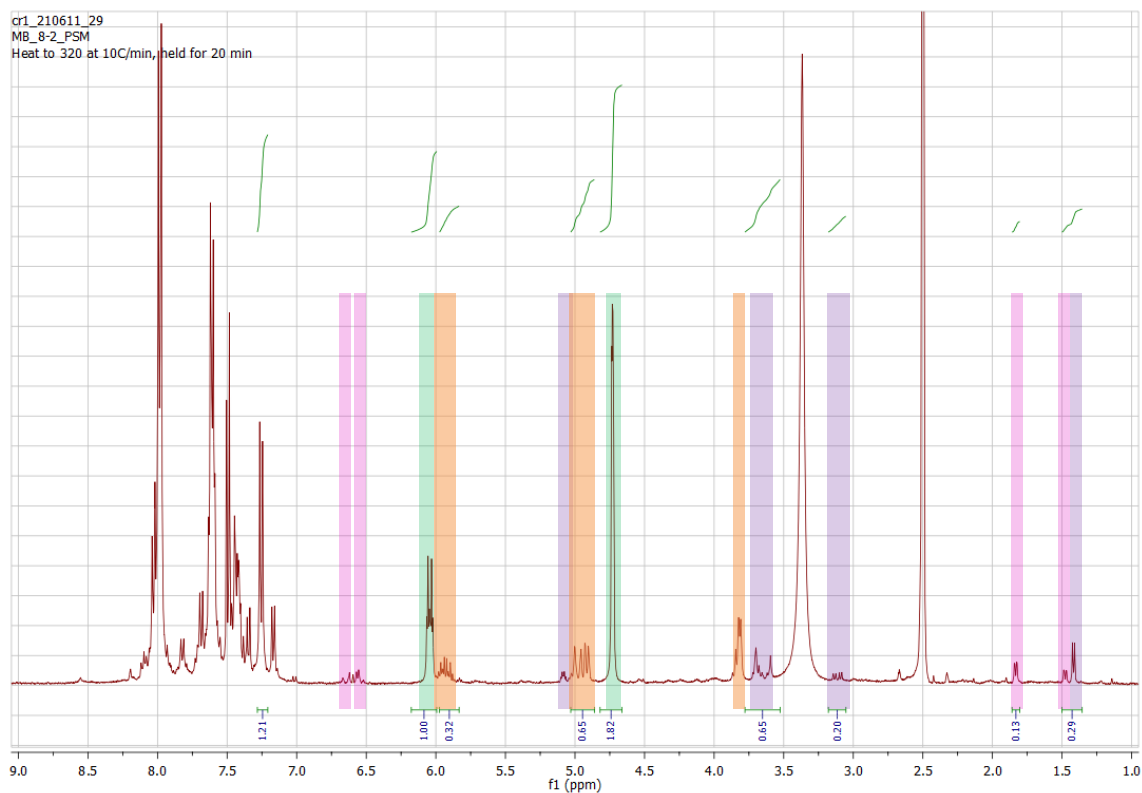

**Figure S19**  $^1\text{H}$  NMR spectrum in DCl and  $\text{DMSO-}d_6$  (reference  $\delta$  2.50 ppm) solution of WUF-44-26PSM. The large broad signal centred around 3.3 ppm is the HOD signal. There are no signals for **L<sup>1</sup>** (4.92 - $\text{CH}_2$ ; 3.61- $\text{CH}$ ) and **L<sup>2</sup>** (4.66 - $\text{CH}_2$ ; 6.01- $\text{CH}$ ; 5.21/5.30 = $\text{CH}_2$ ) linkers meaning the reactions have been driven to completion. The colour codes for products are given in Figure S1.

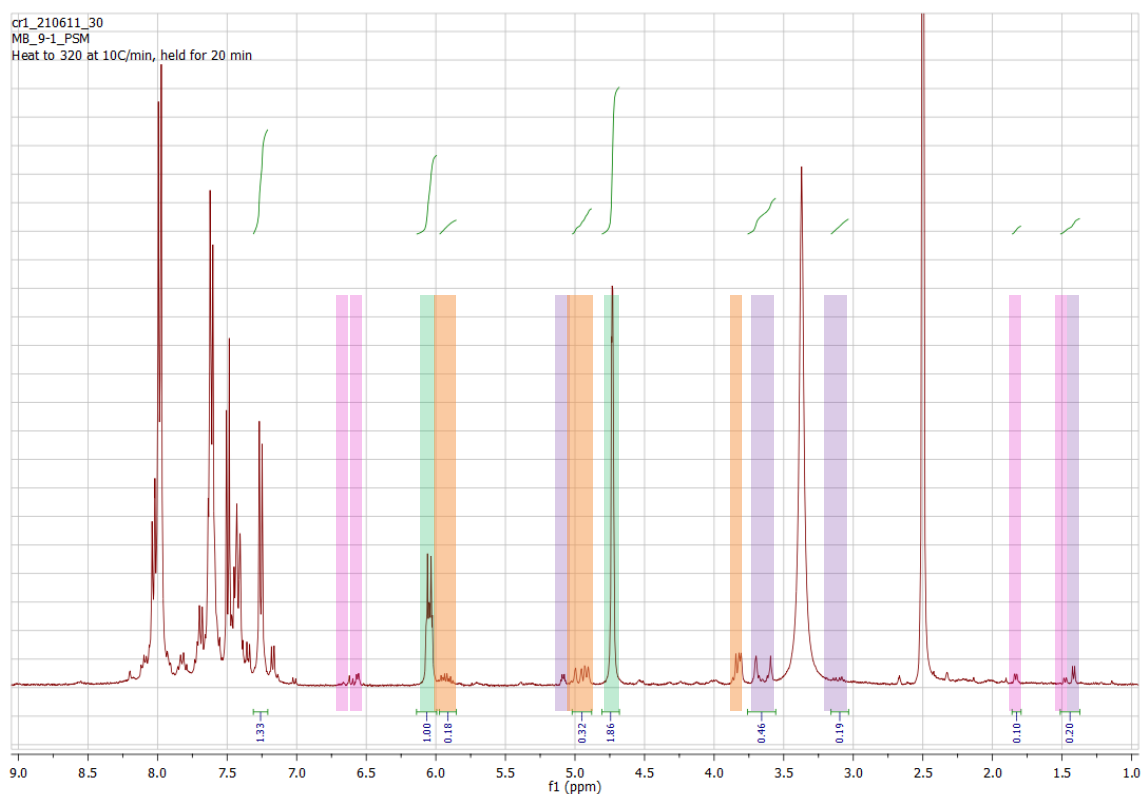

**Figure S20**  $^1\text{H}$  NMR spectrum in DCl and  $\text{DMSO-}d_6$  ( $\delta$  2.50 ppm) solution of WUF-44-8PSM. The large broad signal centred around 3.3 ppm is the HOD signal. There are no signals for **L<sup>1</sup>** (4.92 - $\text{CH}_2$ ; 3.61- $\text{CH}$ ) and **L<sup>2</sup>** (4.66 - $\text{CH}_2$ ; 6.01- $\text{CH}$ ; 5.21/5.30 = $\text{CH}_2$ ) linkers meaning the reactions have gone to completion. The colour codes for products are given in Figure S1.

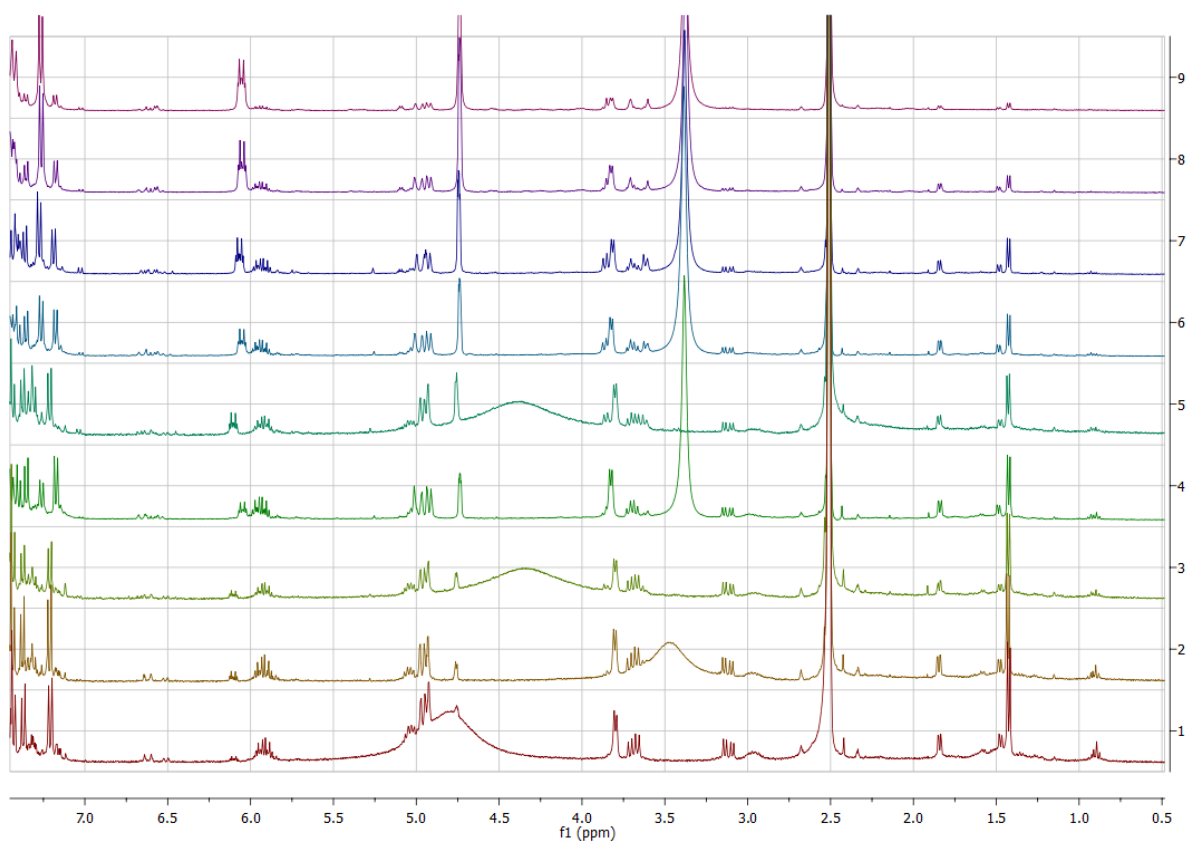

**Figure S 21** Stacked spectra from Figures S12-S20 in the range 7.5-0.5 ppm showing the decrease of products arising from reactions of L<sup>2</sup> linkers and the increase in product arising from reaction of L<sup>1</sup> linkers in the dual modified samples. The labels at right are as follows: **1** WUF-44-89PSM; **2** WUF-44-82PSM; **3** WUF-44-75PSM; **4** WUF-44-65PSM; **5** WUF-44-56PSM; **6** WUF-44-47PSM; **7** WUF-44-33PSM; **8** WUF-44-22PSM; **9** WUF-44-13PSM. Spectra are referenced to  $\delta$  2.50 ppm for DMSO-*d*<sub>6</sub>.



**Table S 3** Approximate MOF formulas derived from  $^1\text{H}$  NMR data of the digestions of modified samples crystals.#

| MOF Formula                                                                                       | WUF Code     |
|---------------------------------------------------------------------------------------------------|--------------|
| $\text{Zn}_4\text{O}(\text{chr})_{0.39}(\text{cla})_{1.16}(\text{dhf})_{0.92}(\text{ole})_{0.54}$ | WUF-44-89PSM |
| $\text{Zn}_4\text{O}(\text{chr})_{0.41}(\text{cla})_{1.24}(\text{dhf})_{0.71}(\text{ole})_{0.64}$ | WUF-44-82PSM |
| $\text{Zn}_4\text{O}(\text{chr})_{0.79}(\text{cla})_{1.13}(\text{dhf})_{0.63}(\text{ole})_{0.44}$ | WUF-44-75PSM |
| $\text{Zn}_4\text{O}(\text{chr})_{0.91}(\text{cla})_{1.15}(\text{dhf})_{0.46}(\text{ole})_{0.48}$ | WUF-44-65PSM |
| $\text{Zn}_4\text{O}(\text{chr})_{1.02}(\text{cla})_{1.07}(\text{dhf})_{0.52}(\text{ole})_{0.40}$ | WUF-44-56PSM |
| $\text{Zn}_4\text{O}(\text{chr})_{1.23}(\text{cla})_{1.15}(\text{dhf})_{0.31}(\text{ole})_{0.31}$ | WUF-44-47PSM |
| $\text{Zn}_4\text{O}(\text{chr})_{1.58}(\text{cla})_{0.91}(\text{dhf})_{0.25}(\text{ole})_{0.26}$ | WUF-44-33PSM |
| $\text{Zn}_4\text{O}(\text{chr})_{2.06}(\text{cla})_{0.66}(\text{dhf})_{0.12}(\text{ole})_{0.17}$ | WUF-44-22PSM |
| $\text{Zn}_4\text{O}(\text{chr})_{2.39}(\text{cla})_{0.38}(\text{dhf})_{0.08}(\text{ole})_{0.14}$ | WUF-44-13PSM |

#We provide this data at the request of the referee and wish to note the inherent inaccuracy in integrations of the low-intensity signals and that caution should be exercised in the proportions estimated for some of these products. We emphasise that the reactions have gone to completion by the absence of the signals for the starting  $\text{L}^1$  and  $\text{L}^2$  linkers. The **ole** components are reported as the total of the *cis*- and *trans*-isomers.

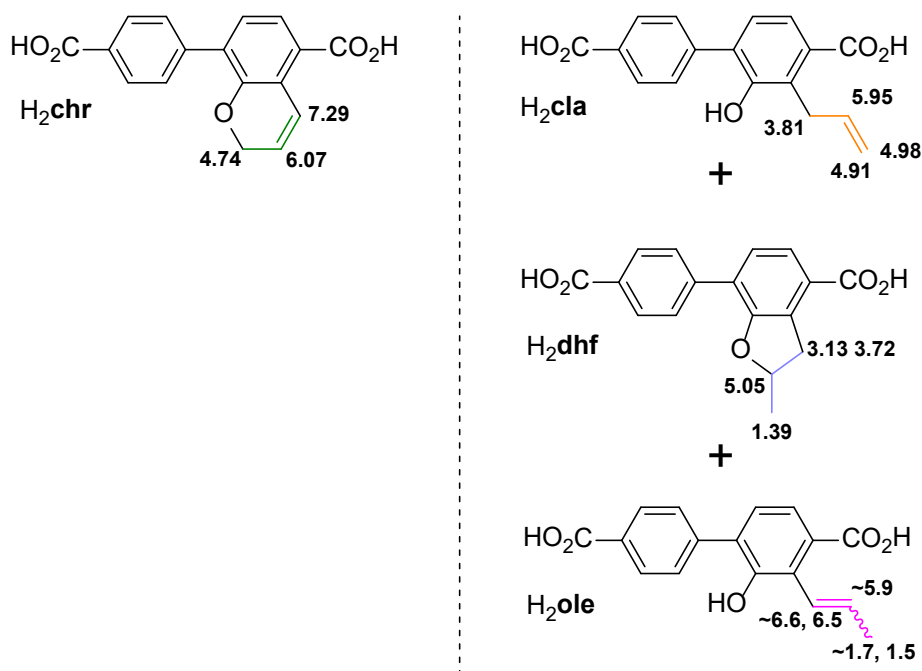

## 4 Powder X-ray Diffraction Patterns

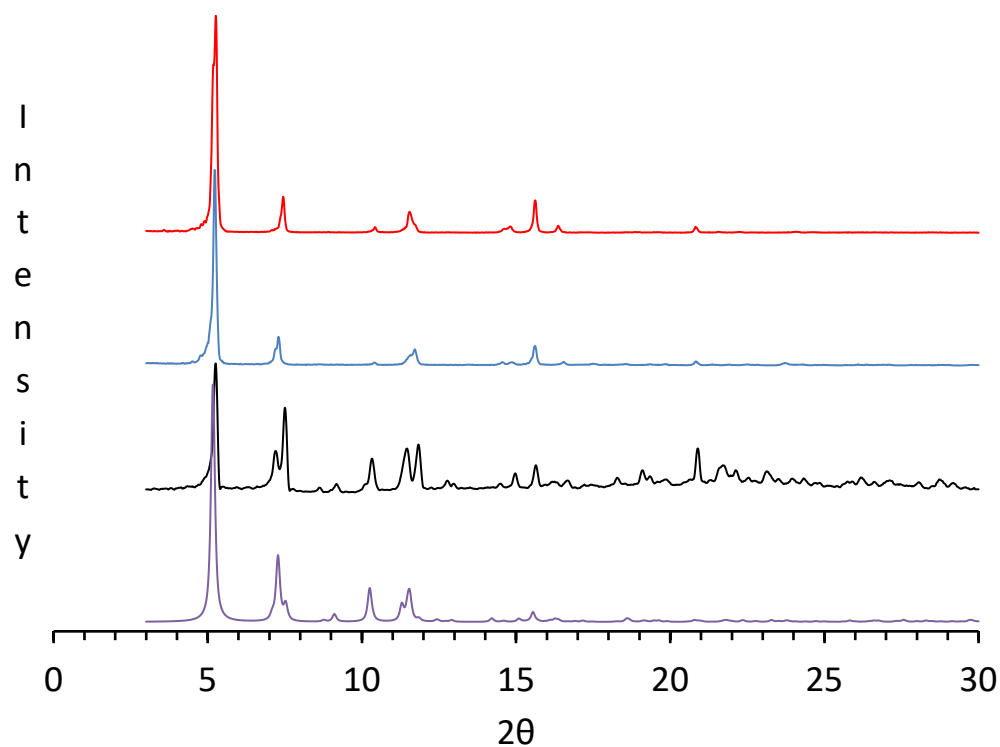

**Figure S 22** Experimental PXRD patterns for 'as synthesised' (black) and activated (blue) WUF-44-89 and WUF-44-89PSM (red) alongside the calculated pattern of a parent 'as synthesised' MOF WUF-35 ( $Zn_4O(L^1)_3$ ) (purple) for reference.

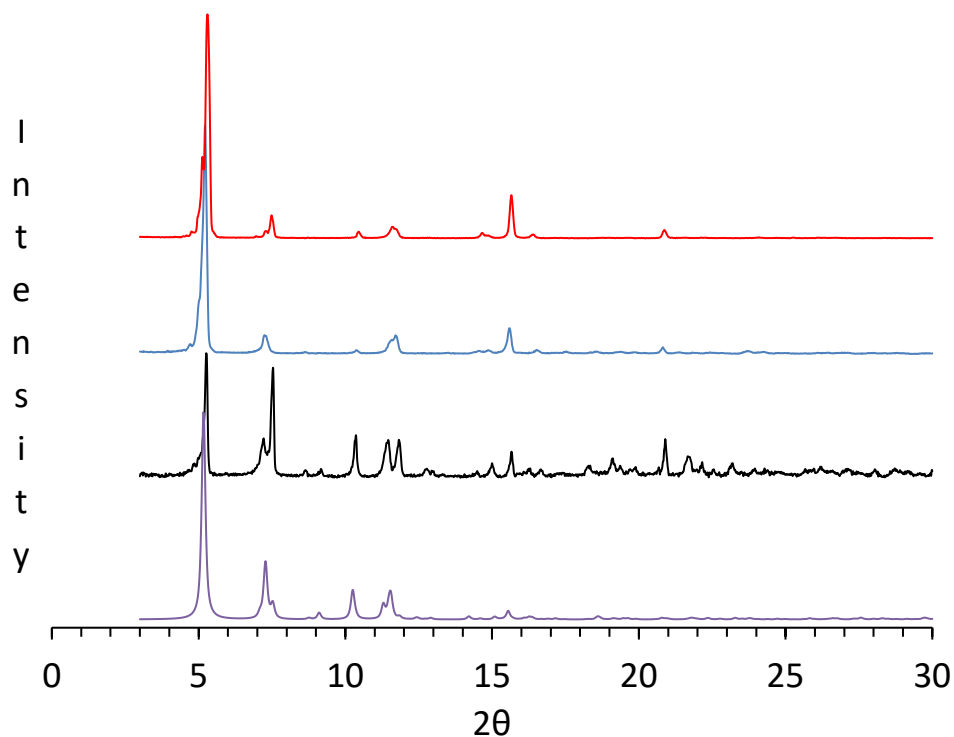

**Figure S 23** Experimental PXRD patterns for 'as synthesised' (black) and activated (blue) WUF-44-82 and WUF-44-82PSM (red) alongside the calculated pattern of a parent 'as synthesised' MOF WUF-35 ( $Zn_4O(L^1)_3$ ) (purple) for reference.

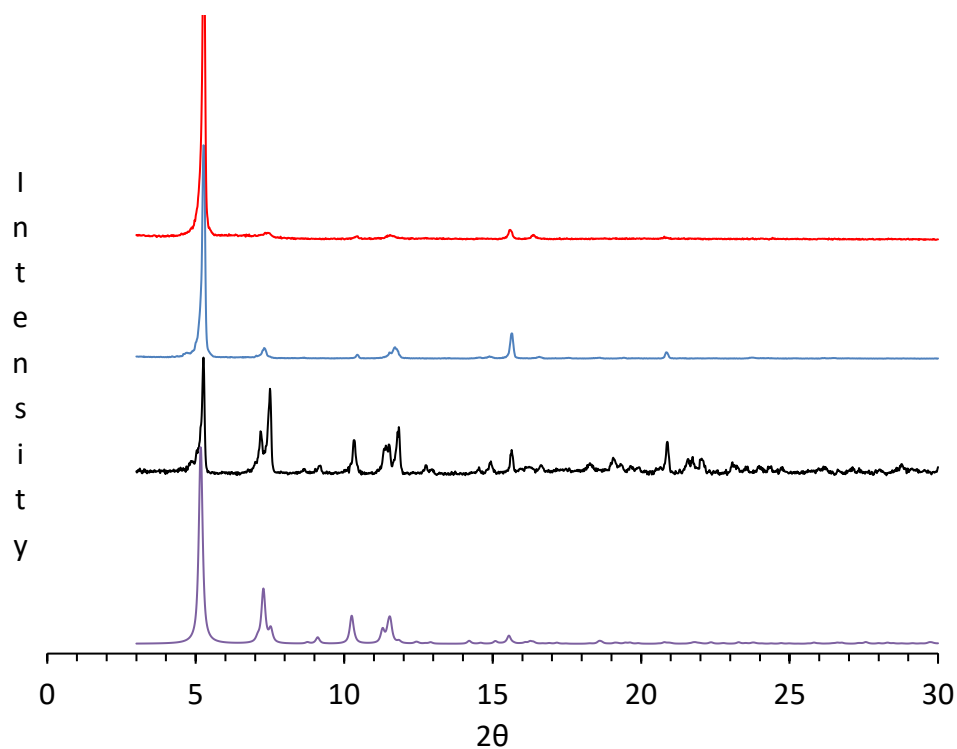

**Figure S 24** Experimental PXRD patterns for 'as synthesised' (black) and activated (blue) WUF-44-75 and WUF-44-75PSM (red) alongside the calculated pattern of a parent 'as synthesised' MOF WUF-35 ( $Zn_4O(L^1)_3$ ) (purple) for reference.

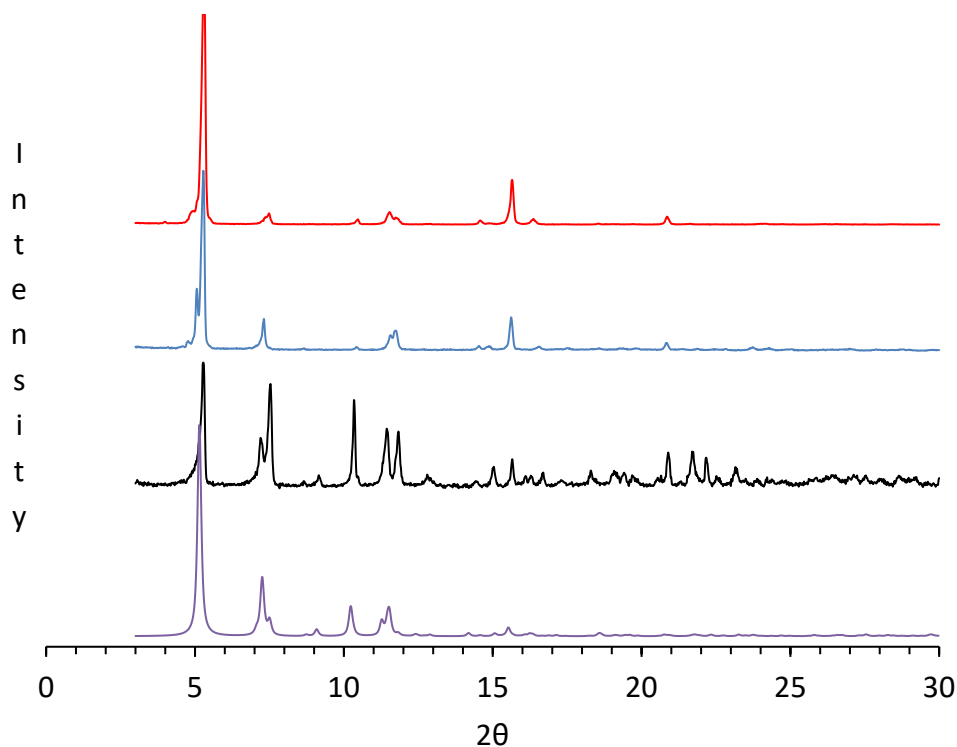

**Figure S 25** Experimental PXRD patterns for 'as synthesised' (black) and activated (blue) WUF-44-65 and WUF-44-65PSM (red) alongside the calculated pattern of a parent 'as synthesised' MOF WUF-35 ( $Zn_4O(L^1)_3$ ) (purple) for reference.

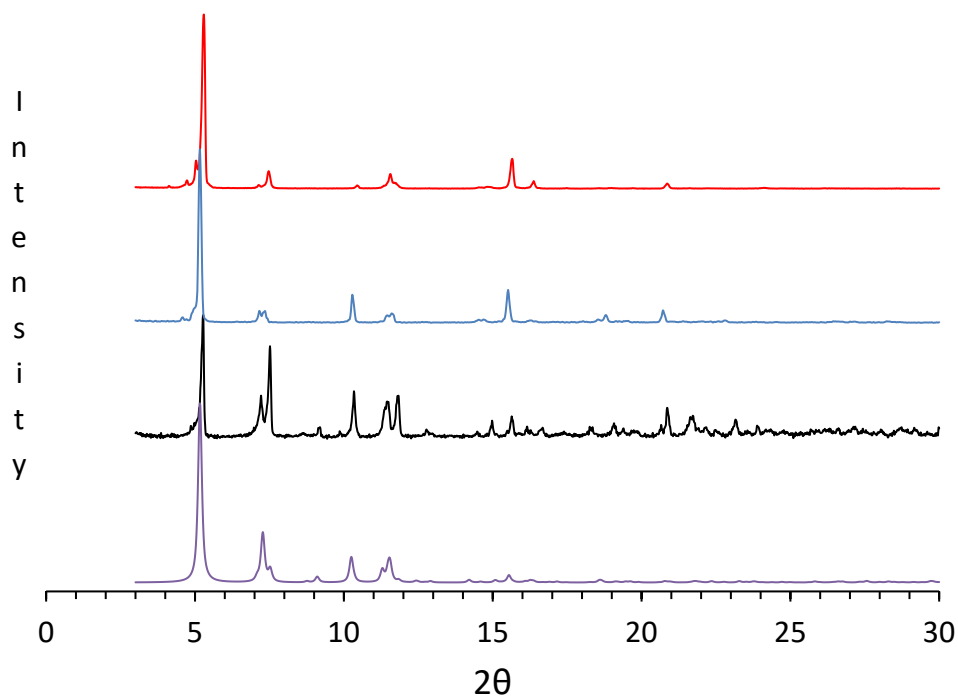

**Figure S 26** Experimental PXRD patterns for 'as synthesised' (black) and activated (blue) WUF-44-56 and WUF-44-56PSM (red) alongside the calculated pattern of a parent 'as synthesised' MOF WUF-35 ( $Zn_4O(L^1)_3$ ) (purple) for reference.

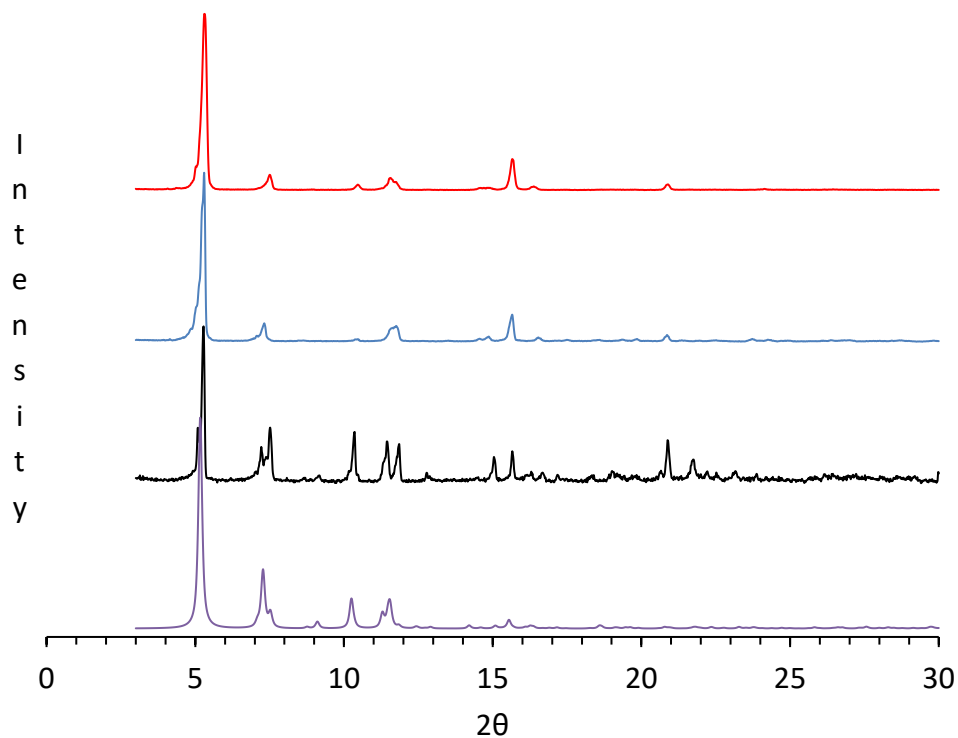

**Figure S 27** Experimental PXRD patterns for 'as synthesised' (black) and activated (blue) WUF-44-47 and WUF-44-47PSM (red) alongside the calculated pattern of a parent 'as synthesised' MOF WUF-35 ( $Zn_4O(L^1)_3$ ) (purple) for reference.

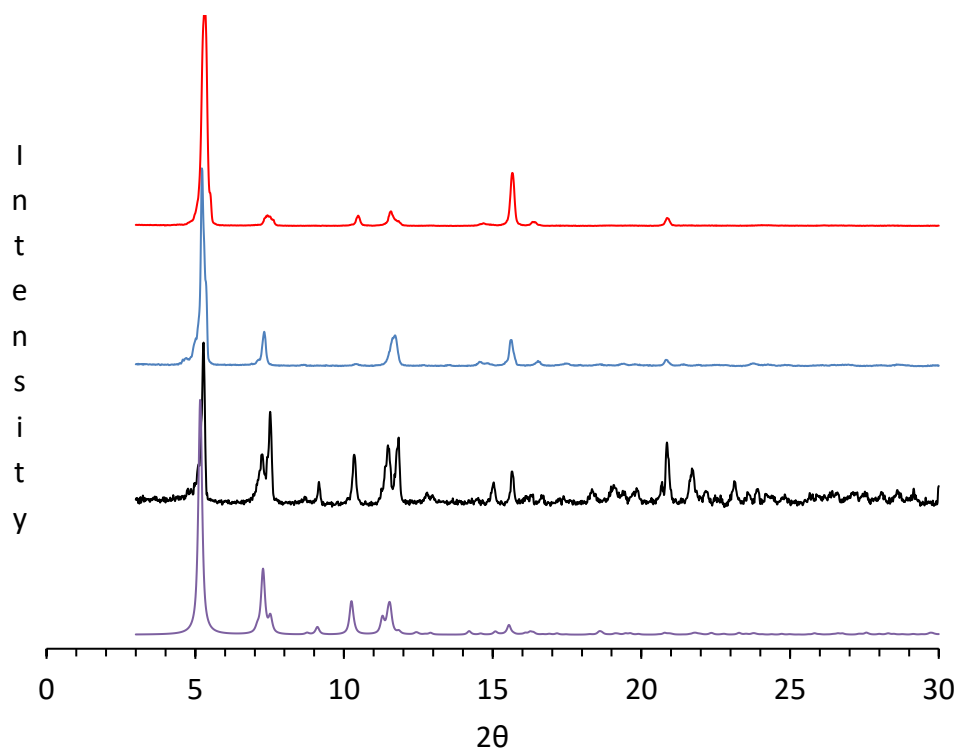

**Figure S 28** Experimental PXRD patterns for 'as synthesised' (black) and activated (blue) WUF-44-33 and WUF-44-33PSM (red) alongside the calculated pattern of a parent 'as synthesised' MOF WUF-35 ( $Zn_4O(L^1)_3$ ) (purple) for reference.

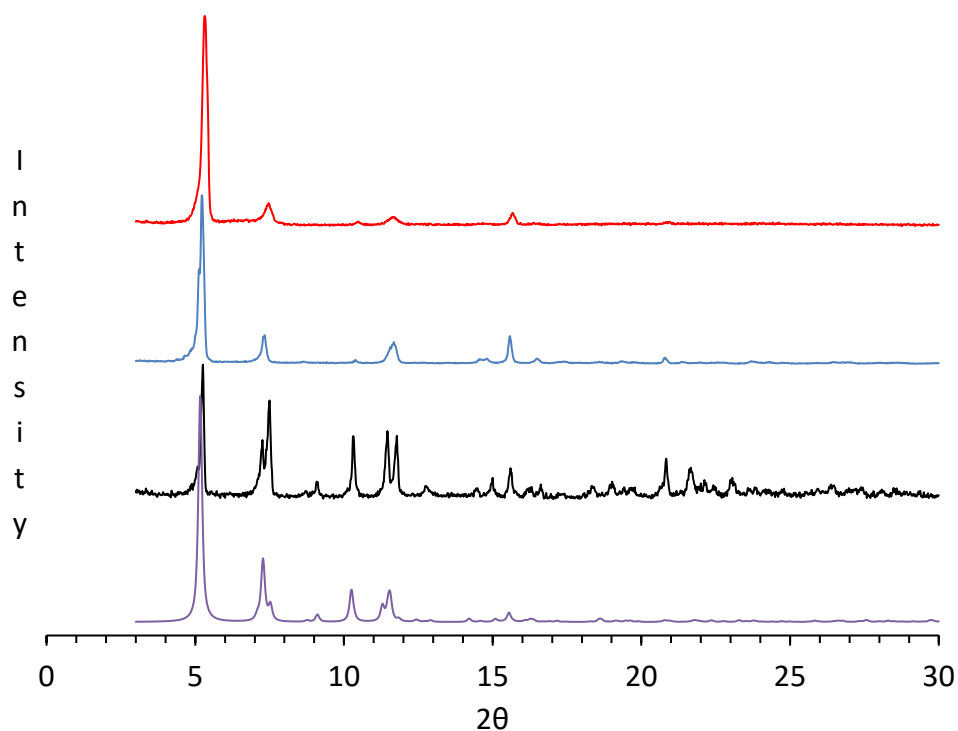

**Figure S 29** Experimental PXRD patterns for 'as synthesised' (black) and activated (blue) WUF-44-22 and WUF-44-22PSM (red) alongside the calculated pattern of a parent 'as synthesised' MOF WUF-35 ( $Zn_4O(L^1)_3$ ) (purple) for reference.

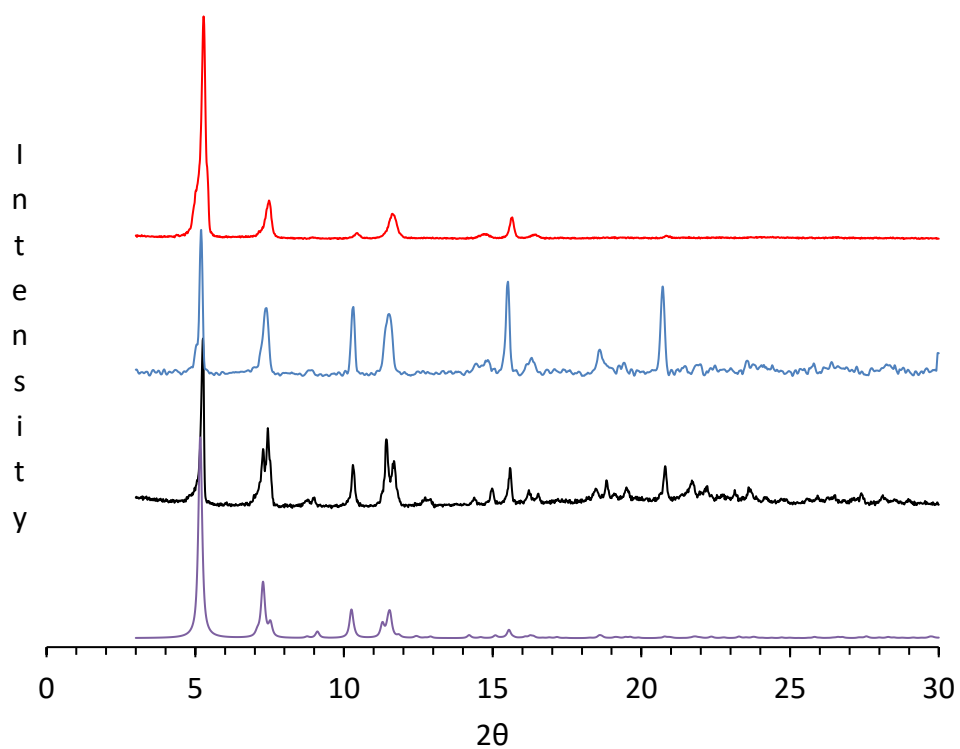

**Figure S 30** Experimental PXRD patterns for 'as synthesised' (black) and activated (blue) WUF-44-13 and WUF-44-13PSM (red) alongside the calculated pattern of a parent 'as synthesised' MOF WUF-35 ( $Zn_4O(L^1)_3$ ) (purple) for reference.

## 5 TG—DTA Data

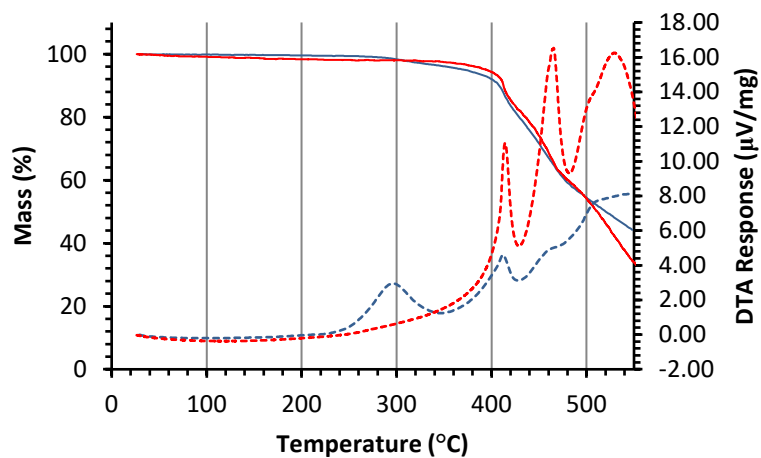

**Figure S 31** TG—DTA for heating activated WUF-44-89 (blue) and WUF-44-89PSM (red) up to 550 °C; TG curves (solid lines); DTA curves (dashed lines).

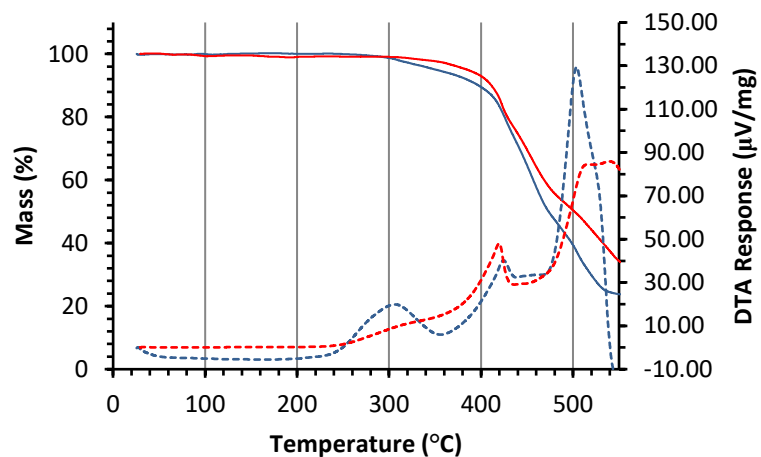

**Figure S 32** TG—DTA for heating activated WUF-44-82 (blue) and WUF-44-82PSM (red) up to 550 °C; TG curves (solid lines); DTA curves (dashed lines).

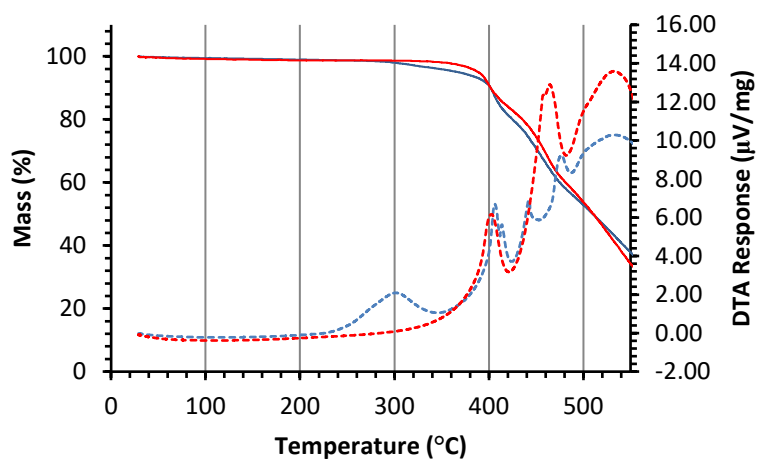

**Figure S 33** TG—DTA for heating activated WUF-44-75 (blue) and WUF-44-75PSM (red) up to 550 °C; TG curves (solid lines); DTA curves (dashed lines).

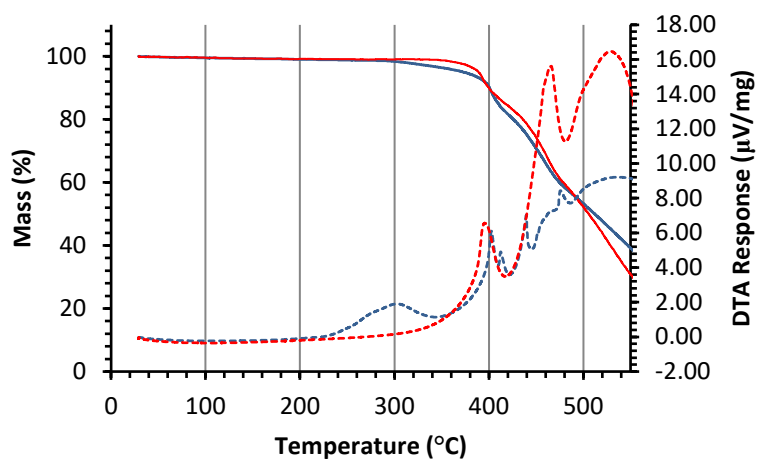

**Figure S 34** TG—DTA for heating activated WUF-44-65 (blue) and WUF-44-65PSM (red) up to 550 °C; TG curves (solid lines); DTA curves (dashed lines).



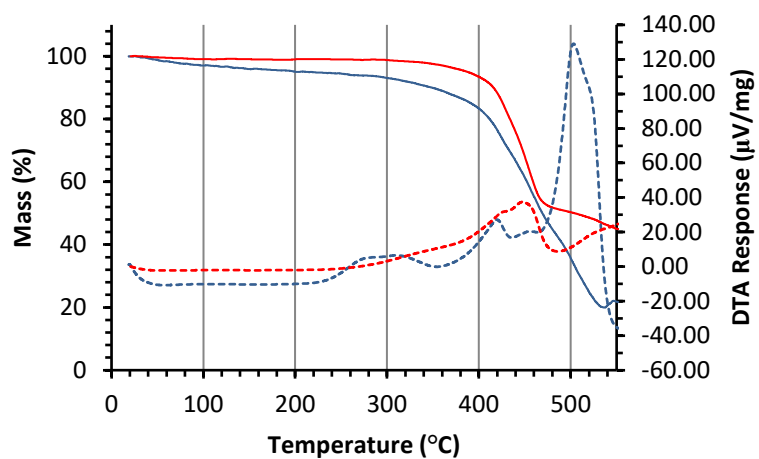

**Figure S 35** TG—DTA for heating activated WUF-44-56 (blue) and WUF-44-56PSM (red) up to 550 °C; TG curves (solid lines); DTA curves (dashed lines).

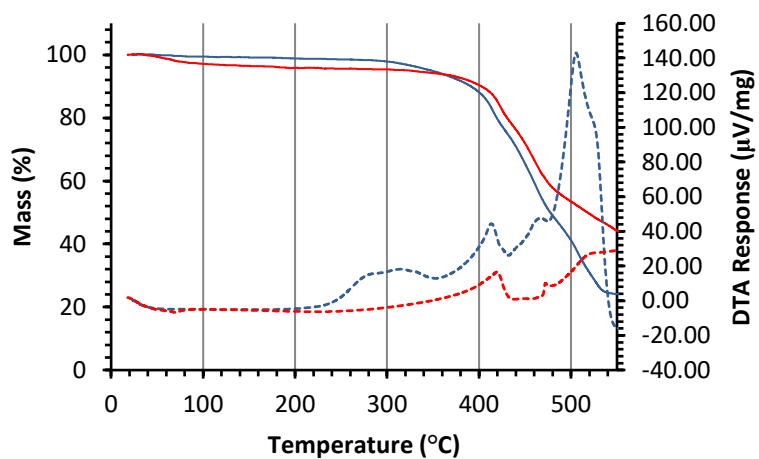

**Figure S 36** TG—DTA for heating activated WUF-44-47 (blue) and WUF-44-47PSM (red) up to 550 °C; TG curves (solid lines); DTA curves (dashed lines).

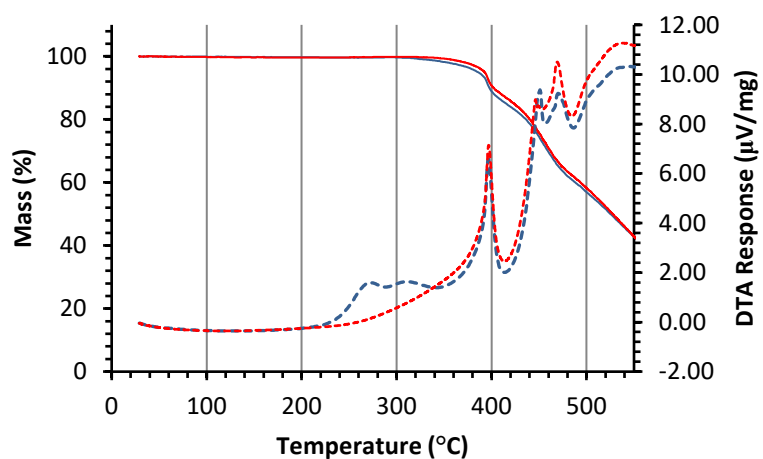

**Figure S 37** TG—DTA for heating activated WUF-44-33 (blue) and WUF-44-33PSM (red) up to 550 °C; TG curves (solid lines); DTA curves (dashed lines).

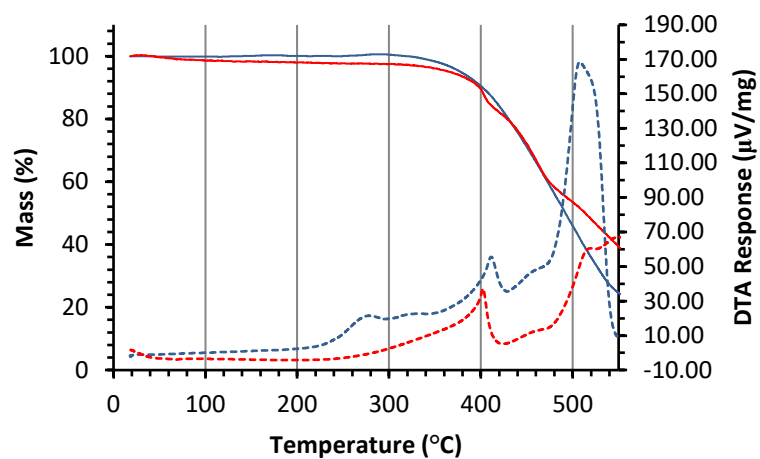

**Figure S 38** TG—DTA for heating activated WUF-44-22 (blue) and WUF-44-22PSM (red) up to 550 °C; TG curves (solid lines); DTA curves (dashed lines).

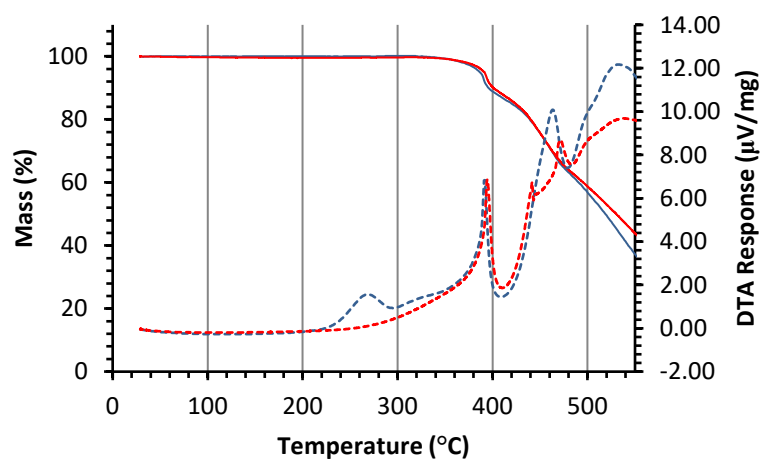

**Figure S 39** TG—DTA for heating activated WUF-44-13 (blue) and WUF-44-13PSM (red) up to 550 °C; TG curves (solid lines); DTA curves (dashed lines).

## 6 Gas Adsorption Isotherms and BET Data

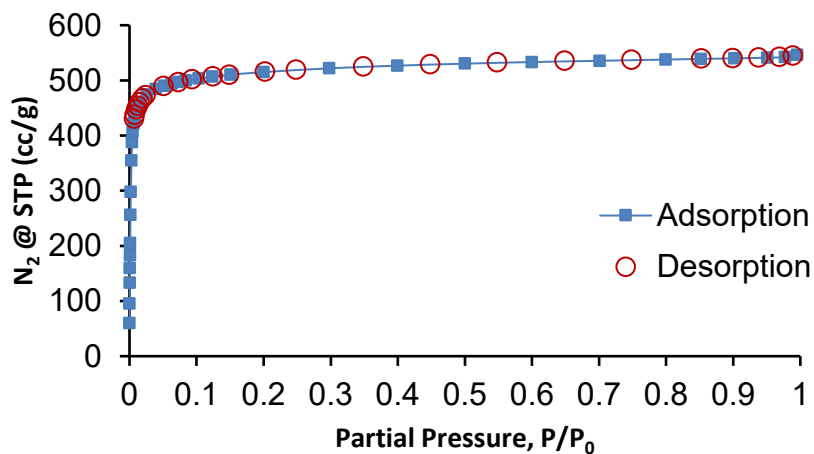

Figure S 40 Isotherm of  $Zn_4O(L^2)_3$ . We re-recorded this data for the current study. It was reported by us previously.<sup>2</sup>

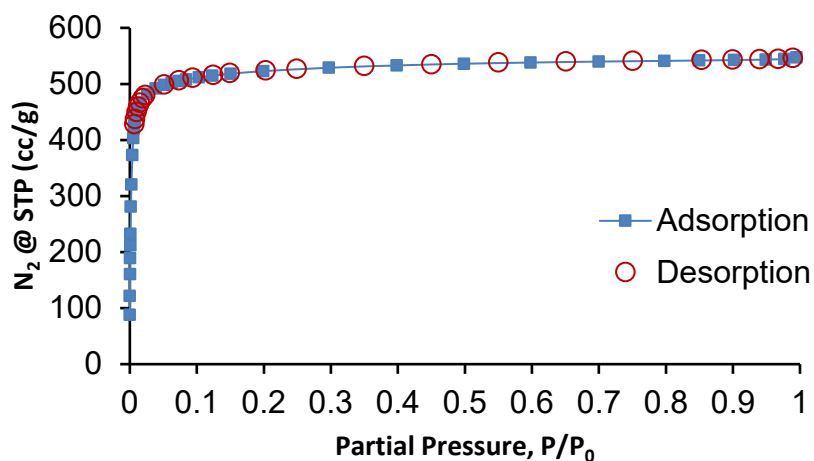

Figure S 41 Isotherm of  $Zn_4O(L^2)_3$  heated to 320 °C for 20 minutes.

| BET summary                | $Zn_4O(L^2)_3$             | Relative Pressure | Volume @ STP | $1 / [ W((P_0/P) - 1) ]$ |
|----------------------------|----------------------------|-------------------|--------------|--------------------------|
|                            |                            | 8.01261e-03       | 437.4542     | 1.4774e-02               |
| Slope                      | 1.688                      | 9.10737e-03       | 443.3428     | 1.6587e-02               |
| Intercept                  | 1.206e-03                  | 1.00427e-02       | 447.2739     | 1.8147e-02               |
| Correlation coefficient, r | 0.999996                   | 1.20346e-02       | 452.6257     | 2.1533e-02               |
| C constant                 | 1400.579                   | 1.50070e-02       | 459.9681     | 2.6502e-02               |
| Surface Area               | 2062.049 m <sup>2</sup> /g | 2.57038e-02       | 474.4455     | 4.4491e-02               |
|                            |                            | 3.91115e-02       | 484.1217     | 6.7271e-02               |

| BET summary                | $Zn_4O(L^2)_3$ PSM         | Relative Pressure | Volume @ STP | $1 / [ W((P_0/P) - 1) ]$ |
|----------------------------|----------------------------|-------------------|--------------|--------------------------|
|                            |                            | 8.99321e-03       | 443.3957     | 1.6376e-02               |
| Slope                      | 1.654                      | 9.80354e-03       | 448.1257     | 1.7677e-02               |
| Intercept                  | 1.426e-03                  | 1.04610e-02       | 451.3749     | 1.8739e-02               |
| Correlation coefficient, r | 0.999992                   | 1.20215e-02       | 457.0802     | 2.1299e-02               |
| C constant                 | 1161.514                   | 1.50440e-02       | 465.5290     | 2.6251e-02               |
| Surface Area               | 2103.289 m <sup>2</sup> /g | 2.63043e-02       | 482.2583     | 4.4820e-02               |
|                            |                            | 3.88862e-02       | 491.6892     | 6.5839e-02               |

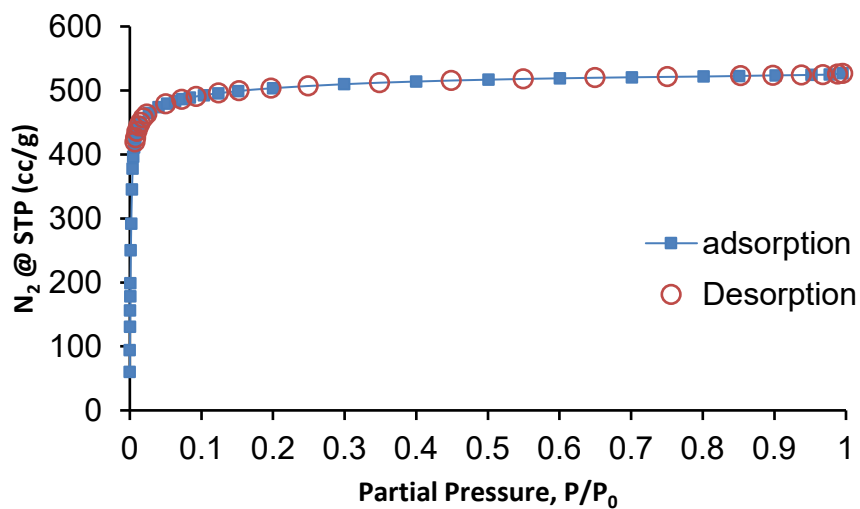

Figure S 42 Isotherm of WUF-44-89

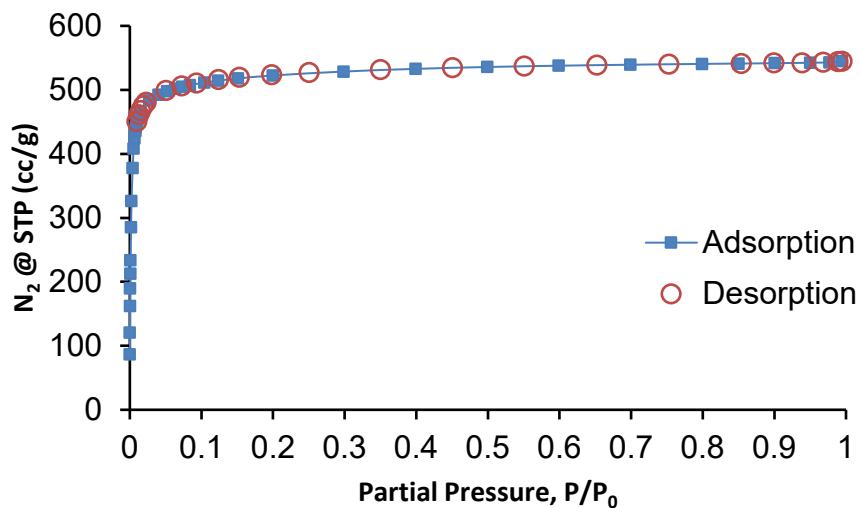

Figure S 43 Isotherm of WUF-44-89PSM.

| BET summary                | WUF-44-89                  | Relative Pressure | Volume @ STP | 1 /   W((Po/P) - 1) |
|----------------------------|----------------------------|-------------------|--------------|---------------------|
|                            |                            | 8.02795e-03       | 426.4728     | 426.4728            |
| Slope                      | 1.724                      | 9.12510e-03       | 432.3239     | 1.7044e-02          |
| Intercept                  | 1.270e-03                  | 1.00331e-02       | 436.1987     | 1.8590e-02          |
| Correlation coefficient, r | 0.999994                   | 1.20735e-02       | 443.2281     | 2.2061e-02          |
| C constant                 | 1359.137                   | 1.50762e-02       | 450.3068     | 2.7198e-02          |
| Surface Area               | 2018.046 m <sup>2</sup> /g | 2.66886e-02       | 464.9930     | 4.7182e-02          |
|                            |                            | 4.01034e-02       | 474.1188     | 7.0505e-02          |

| BET summary                | WUF-44-89PSM               | Relative Pressure | Volume @ STP | 1 /   W((Po/P) - 1) |
|----------------------------|----------------------------|-------------------|--------------|---------------------|
|                            |                            | 9.43319e-03       | 446.5092     | 1.7065e-02          |
| Slope                      | 1.657                      | 1.02311e-02       | 450.5847     | 1.8355e-02          |
| Intercept                  | 1.361e-03                  | 1.08268e-02       | 453.1802     | 1.9324e-02          |
| Correlation coefficient, r | 0.999992                   | 1.26135e-02       | 459.3684     | 2.2250e-02          |
| C constant                 | 1218.578                   | 1.52747e-02       | 466.3038     | 2.6616e-02          |
| Surface Area               | 2099.425 m <sup>2</sup> /g | 2.73822e-02       | 483.2701     | 4.6611e-02          |
|                            |                            | 4.02096e-02       | 492.2433     | 6.8096e-02          |

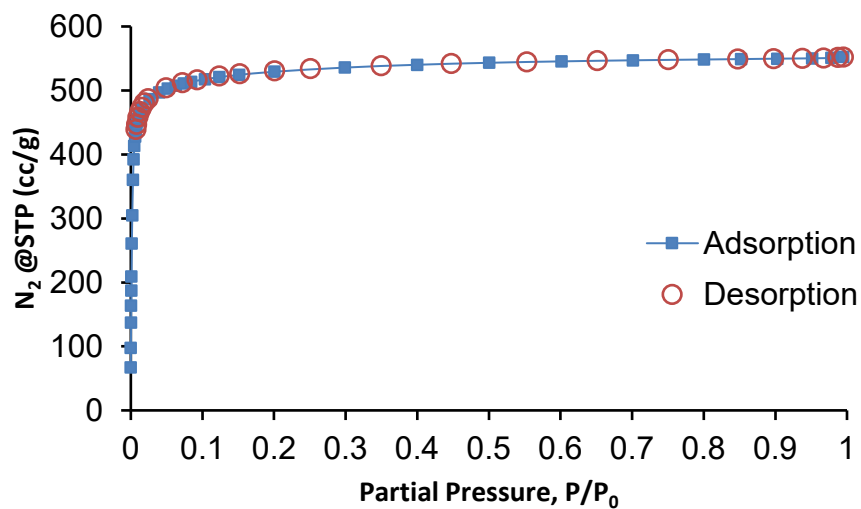

Figure S 44 Isotherm of WUF-44-82.

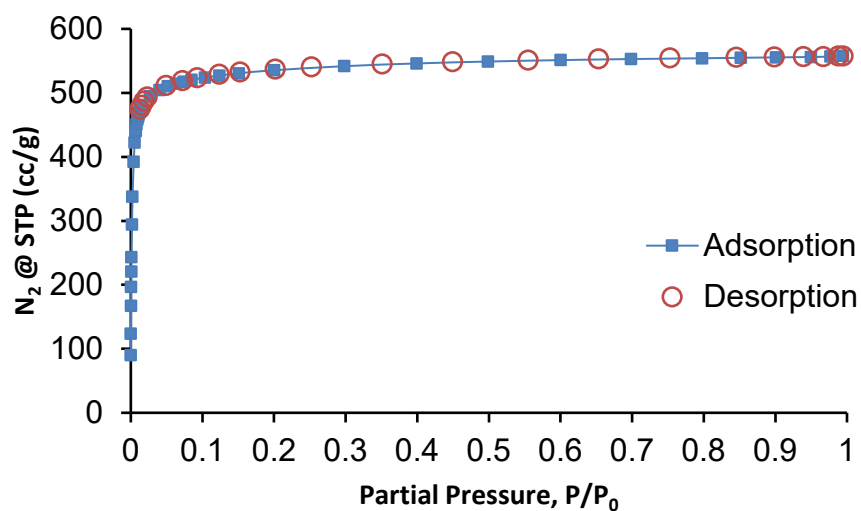

Figure S 45 Isotherm of WUF-44-82PSM.

| BET summary                | WUF-44-82                  | Relative Pressure | Volume @ STP | 1 /   W((Po/P) - 1) |
|----------------------------|----------------------------|-------------------|--------------|---------------------|
|                            |                            | 8.11189e-03       | 445.8459     | 1.4677e-02          |
| Slope                      | 1.643                      | 9.11177e-03       | 451.5228     | 1.6295e-02          |
| Intercept                  | 1.290e-03                  | 9.96736e-03       | 455.4914     | 1.7685e-02          |
| Correlation coefficient, r | 0.999995                   | 1.21754e-02       | 463.8231     | 2.1262e-02          |
| C constant                 | 1274.736                   | 1.51675e-02       | 471.2920     | 2.6146e-02          |
| Surface Area               | 2118.028 m <sup>2</sup> /g | 2.64232e-02       | 486.6893     | 4.4618e-02          |
|                            |                            | 3.98413e-02       | 496.9326     | 6.6810e-02          |

| BET summary                | WUF-44-82PSM               | Relative Pressure | Volume @ STP | 1 /   W((Po/P) - 1) |
|----------------------------|----------------------------|-------------------|--------------|---------------------|
|                            |                            | 1.02152e-02       | 462.4973     | 1.7855e-02          |
| Slope                      | 1.619                      | 1.08638e-02       | 465.4344     | 1.8881e-02          |
| Intercept                  | 1.257e-03                  | 1.13284e-02       | 467.2752     | 1.9620e-02          |
| Correlation coefficient, r | 0.999993                   | 1.34238e-02       | 473.7353     | 2.2981e-02          |
| C constant                 | 1289.144                   | 1.60100e-02       | 479.9582     | 2.7124e-02          |
| Surface Area               | 2149.065 m <sup>2</sup> /g | 2.69020e-02       | 494.8001     | 4.4704e-02          |
|                            |                            | 4.02114e-02       | 504.5221     | 6.6442e-02          |

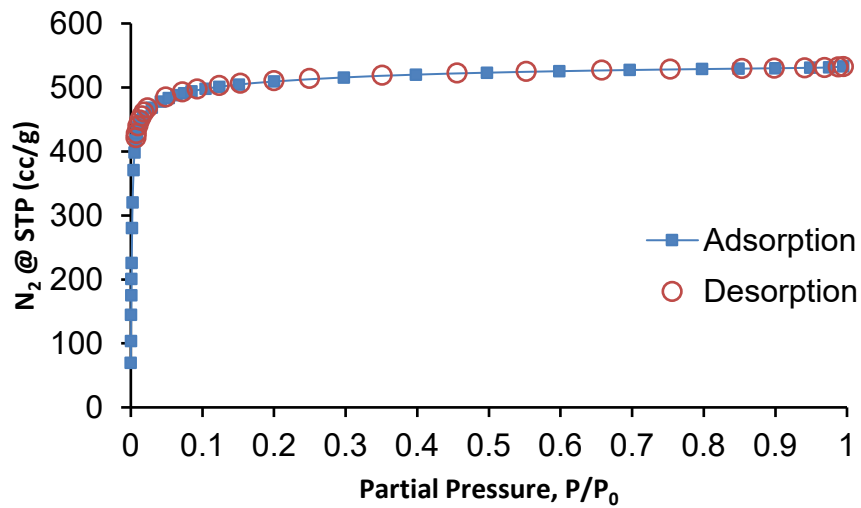

Figure S 46 Isotherm of WUF-44-75.

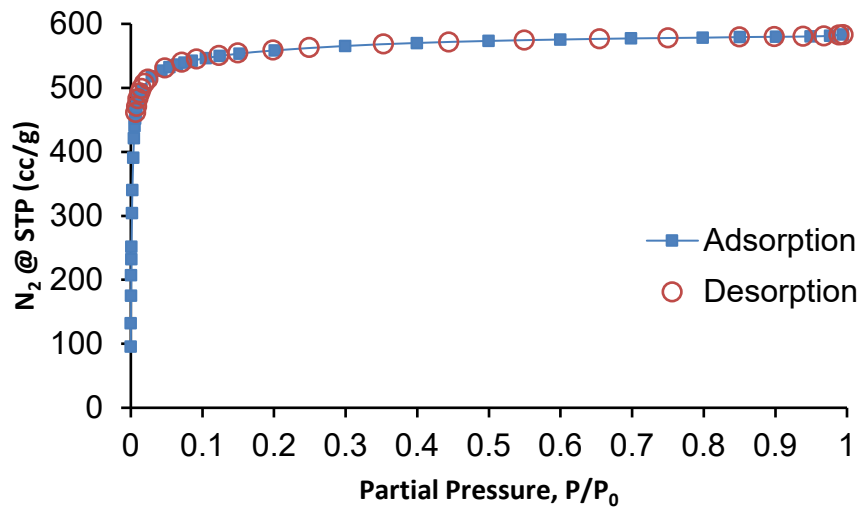

Figure S 47 Isotherm of WUF-44-75PSM.

| BET summary                | WUF-44-75                  | Relative Pressure | Volume @ STP | 1 /   W((Po/P) - 1) |
|----------------------------|----------------------------|-------------------|--------------|---------------------|
|                            |                            | 1.24440e-02       | 443.5837     | 2.2729e-02          |
| Slope                      | 1.721                      | 1.27571e-02       | 444.3862     | 2.3266e-02          |
| Intercept                  | 1.266e-03                  | 1.46283e-02       | 448.7678     | 2.6468e-02          |
| Correlation coefficient, r | 0.999994                   | 1.74544e-02       | 453.9558     | 3.1310e-02          |
| C constant                 | 1361.209                   | 2.93863e-02       | 468.2107     | 5.1738e-02          |
| Surface Area               | 2021.611 m <sup>2</sup> /g | 4.22211e-02       | 477.8506     | 7.3811e-02          |
|                            |                            | 5.33806e-02       | 483.6119     | 9.3296e-02          |

| BET summary                | WUF-44-75PSM               | Relative Pressure | Volume @ STP | 1 /   W((Po/P) - 1) |
|----------------------------|----------------------------|-------------------|--------------|---------------------|
|                            |                            | 8.08445e-03       | 469.1373     | 1.3900e-02          |
| Slope                      | 1.555                      | 9.03669e-03       | 475.8486     | 1.5333e-02          |
| Intercept                  | 1.239e-03                  | 1.00039e-02       | 481.4077     | 1.6795e-02          |
| Correlation coefficient, r | 0.999991                   | 1.20567e-02       | 488.7489     | 1.9978e-02          |
| C constant                 | 1256.610                   | 1.50800e-02       | 497.6349     | 2.4617e-02          |
| Surface Area               | 2237.398 m <sup>2</sup> /g | 2.94610e-02       | 517.6734     | 4.6917e-02          |
|                            |                            | 4.29608e-02       | 526.9727     | 6.8156e-02          |

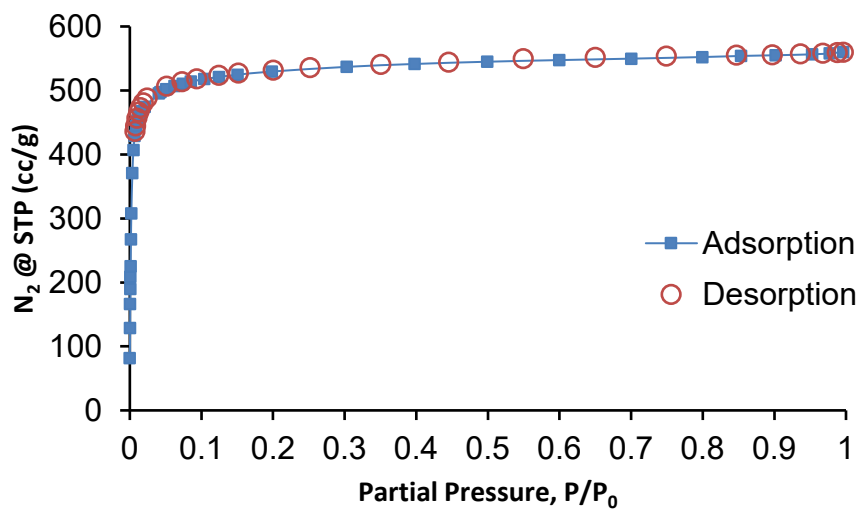

Figure S 48 Isotherm of WUF-44-65.

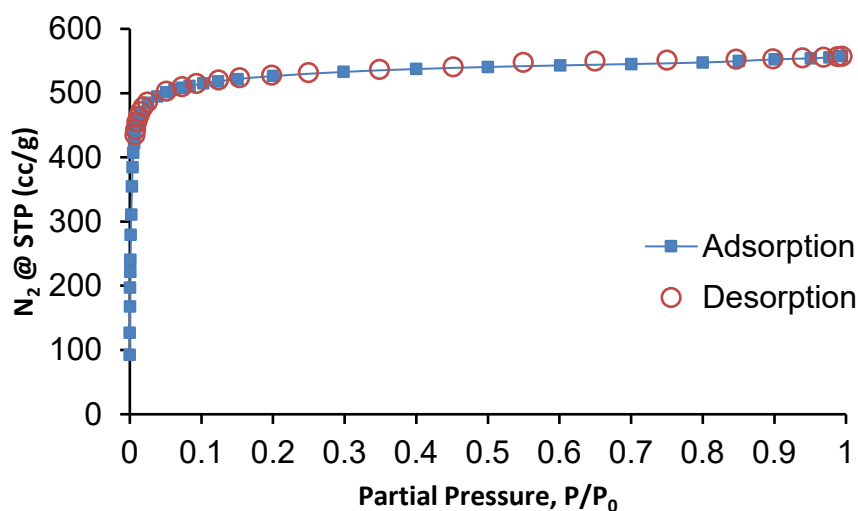

Figure S 49 Isotherm of WUF-44-65PSM.

| BET summary                | WUF-44-65                  | Relative Pressure | Volume @ STP | 1 / [ W((Po/P) - 1) ] |
|----------------------------|----------------------------|-------------------|--------------|-----------------------|
|                            |                            | 1.24901e-02       | 458.2266     | 2.2085e-02            |
| Slope                      | 1.644                      | 1.35201e-02       | 461.0336     | 2.3785e-02            |
| Intercept                  | 1.585e-03                  | 1.41958e-02       | 462.6371     | 2.4904e-02            |
| Correlation coefficient, r | 0.999998                   | 1.64639e-02       | 467.3040     | 2.8661e-02            |
| C constant                 | 1038.425                   | 2.11798e-02       | 474.4907     | 3.6487e-02            |
| Surface Area               | 2116.415 m <sup>2</sup> /g | 4.08573e-02       | 495.6612     | 6.8762e-02            |
|                            |                            | 4.27197e-02       | 497.4695     | 7.1775e-02            |

| BET summary                | WUF-44-65PSM               | Relative Pressure | Volume @ STP | 1 / [ W((Po/P) - 1) ] |
|----------------------------|----------------------------|-------------------|--------------|-----------------------|
|                            |                            | 8.03316e-03       | 441.7625     | 1.4667e-02            |
| Slope                      | 1.643                      | 9.11159e-03       | 448.7896     | 1.6394e-02            |
| Intercept                  | 1.377e-03                  | 1.00202e-02       | 453.5049     | 1.7857e-02            |
| Correlation coefficient, r | 0.999990                   | 1.21211e-02       | 461.8508     | 2.1256e-02            |
| C constant                 | 1194.693                   | 1.49835e-02       | 469.6912     | 2.5912e-02            |
| Surface Area               | 2117.539 m <sup>2</sup> /g | 2.54869e-02       | 485.0341     | 4.3143e-02            |
|                            |                            | 3.84401e-02       | 494.9045     | 6.4630e-02            |



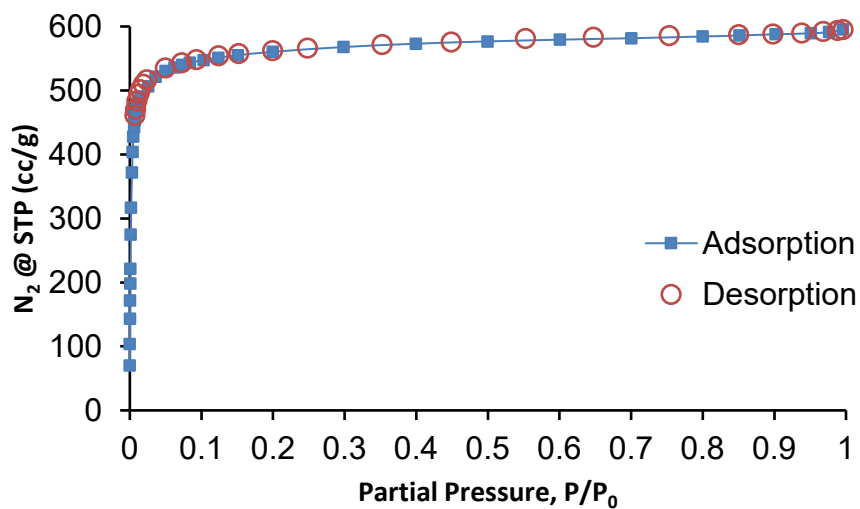

Figure S 50 Isotherm of WUF-44-56.

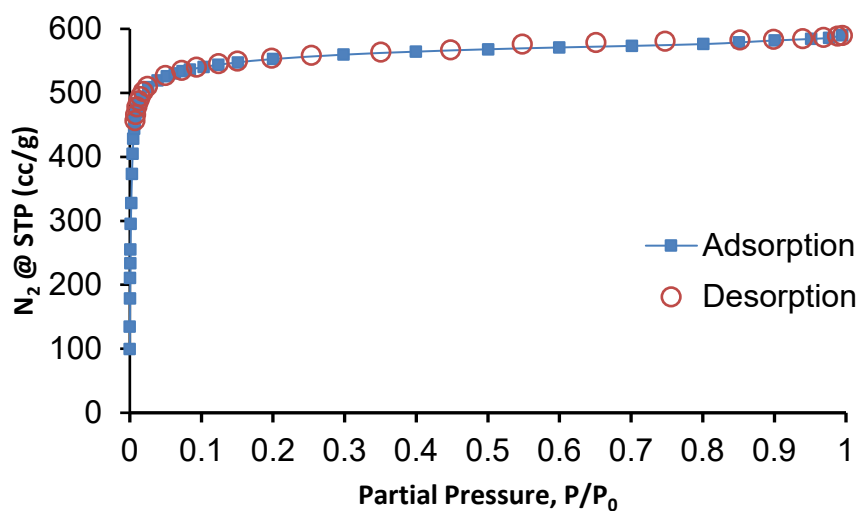

Figure S 51 Isotherm of WUF-44-56PSM.

| BET summary                | WUF-44-56                  | Relative Pressure | Volume @ STP | 1 /   W((Po/P) - 1) |
|----------------------------|----------------------------|-------------------|--------------|---------------------|
|                            |                            | 9.14285e-03       | 469.3398     | 1.5730e-02          |
| Slope                      | 1.556                      | 9.99343e-03       | 473.6987     | 1.7050e-02          |
| Intercept                  | 1.522e-03                  | 1.20866e-02       | 482.2964     | 2.0297e-02          |
| Correlation coefficient, r | 0.999988                   | 1.52280e-02       | 490.6295     | 2.5218e-02          |
| C constant                 | 1023.492                   | 2.59285e-02       | 506.2404     | 4.2071e-02          |
| Surface Area               | 2236.233 m <sup>2</sup> /g | 3.62767e-02       | 521.3861     | 5.7765e-02          |
|                            |                            | 4.99656e-02       | 530.6302     | 7.9303e-02          |

| BET summary                | WUF-44-56PSM               | Relative Pressure | Volume @ STP | 1 /   W((Po/P) - 1) |
|----------------------------|----------------------------|-------------------|--------------|---------------------|
|                            |                            | 8.11664e-03       | 464.3036     | 1.4101e-02          |
| Slope                      | 1.567                      | 8.99291e-03       | 470.2549     | 1.5440e-02          |
| Intercept                  | 1.301e-03                  | 9.96335e-03       | 475.5894     | 1.6931e-02          |
| Correlation coefficient, r | 0.999991                   | 1.20084e-02       | 484.1066     | 2.0088e-02          |
| C constant                 | 1205.395                   | 1.52373e-02       | 493.3375     | 2.5095e-02          |
| Surface Area               | 2220.369 m <sup>2</sup> /g | 2.58176e-02       | 509.0579     | 4.1654e-02          |
|                            |                            | 3.89743e-02       | 519.4898     | 6.2462e-02          |

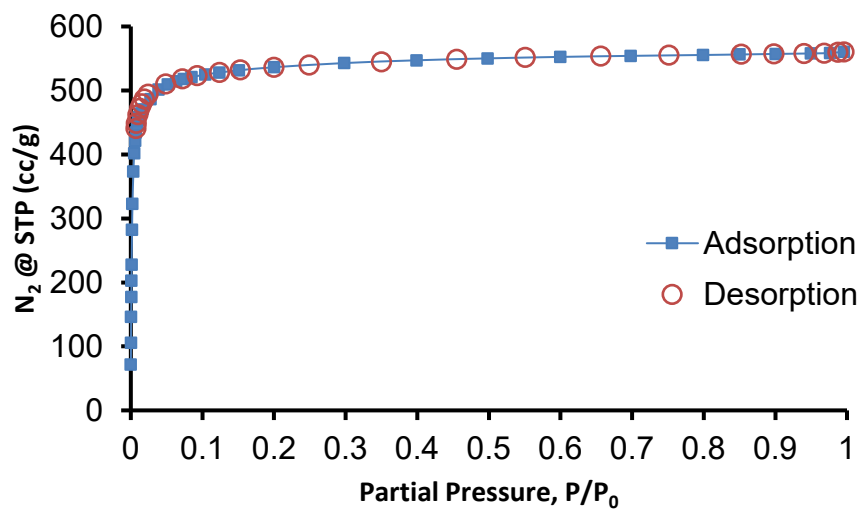

Figure S 52 Isotherm of WUF-44-47.

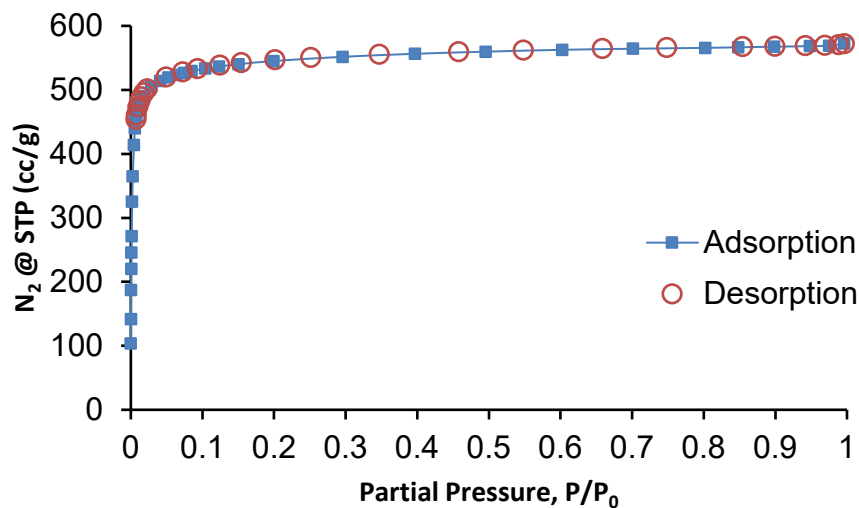

Figure S 53 Isotherm of WUF-44-47PSM.

| BET summary                | WUF-44-47                  | Relative Pressure | Volume @ STP | 1 /   W((Po/P) - 1) |
|----------------------------|----------------------------|-------------------|--------------|---------------------|
|                            |                            | 1.04904E-02       | 453.3785     | 1.8710E-02          |
| Slope                      | 1.617                      | 1.11979E-02       | 456.2471     | 1.9860E-02          |
| Intercept                  | 1.802e-03                  | 1.18131E-02       | 458.427      | 2.0864E-02          |
| Correlation coefficient, r | 0.999968                   | 1.37660E-02       | 463.9469     | 2.4072E-02          |
| C constant                 | 898.759                    | 1.65928E-02       | 470.3277     | 2.8704E-02          |
| Surface Area               | 2150.676 m <sup>2</sup> /g | 2.79188E-02       | 486.5931     | 4.7226E-02          |
|                            |                            | 3.86611E-02       | 501.5225     | 6.4159E-02          |

| BET summary                | WUF-44-47PSM               | Relative Pressure | Volume @ STP | 1 /   W((Po/P) - 1) |
|----------------------------|----------------------------|-------------------|--------------|---------------------|
|                            |                            | 1.18447e-02       | 477.9230     | 2.0067e-02          |
| Slope                      | 1.595                      | 1.20998e-02       | 478.8822     | 2.0464e-02          |
| Intercept                  | 1.130e-03                  | 1.24007e-02       | 479.8479     | 2.0937e-02          |
| Correlation coefficient, r | 0.999994                   | 1.41608e-02       | 484.6609     | 2.3713e-02          |
| C constant                 | 1412.890                   | 1.68803e-02       | 490.4942     | 2.8008e-02          |
| Surface Area               | 2181.397 m <sup>2</sup> /g | 2.86067e-02       | 504.9726     | 4.6661e-02          |
|                            |                            | 4.12340e-02       | 513.7383     | 6.6981e-02          |

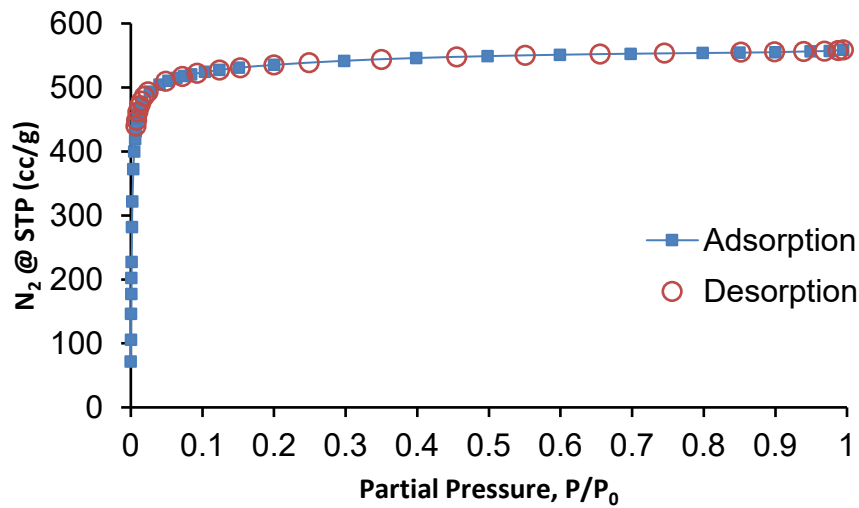

Figure S 54 Isotherm of WUF-44-33.

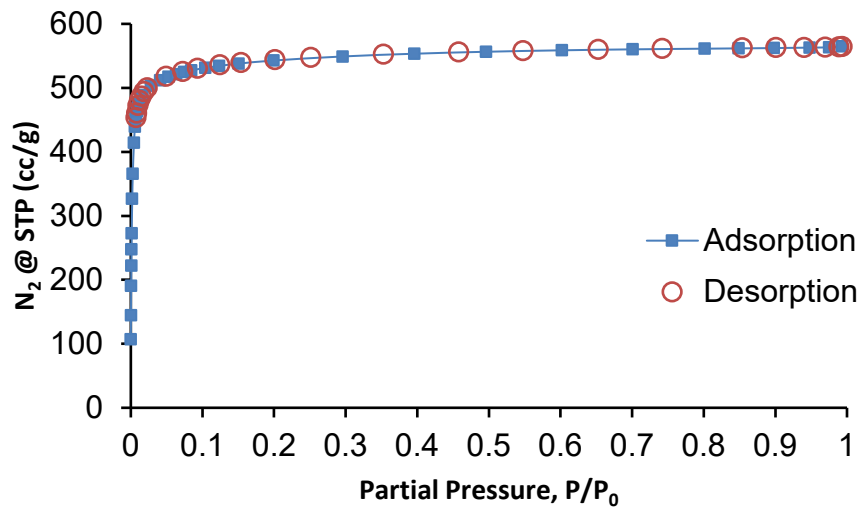

Figure S 55 Isotherm of WUF-44-33PSM.

| BET summary                | WUF-44-33                  | Relative Pressure | Volume @ STP | 1 /   W((Po/P) - 1) |
|----------------------------|----------------------------|-------------------|--------------|---------------------|
|                            |                            | 9.63901e-03       | 452.6748     | 1.7203e-02          |
| Slope                      | 1.610                      | 1.03029e-02       | 456.9278     | 1.8229e-02          |
| Intercept                  | 1.629e-03                  | 1.10816e-02       | 460.2435     | 1.9481e-02          |
| Correlation coefficient, r | 0.999993                   | 1.29803e-02       | 467.0731     | 2.2528e-02          |
| C constant                 | 989.150                    | 1.58025e-02       | 474.8742     | 2.7053e-02          |
| Surface Area               | 2160.894 m <sup>2</sup> /g | 2.67589e-02       | 493.5913     | 4.4569e-02          |
|                            |                            | 4.04341e-02       | 504.6477     | 6.6809e-02          |

| BET summary                | WUF-44-33PSM               | Relative Pressure | Volume @ STP | 1 /   W((Po/P) - 1) |
|----------------------------|----------------------------|-------------------|--------------|---------------------|
|                            |                            | 1.13110e-02       | 475.4953     | 1.9251e-02          |
| Slope                      | 1.601                      | 1.15654e-02       | 476.3544     | 1.9653e-02          |
| Intercept                  | 1.105e-03                  | 1.19239e-02       | 477.5274     | 2.0220e-02          |
| Correlation coefficient, r | 0.999994                   | 1.36691e-02       | 482.6242     | 2.2975e-02          |
| C constant                 | 1449.080                   | 1.64836e-02       | 488.6542     | 2.7442e-02          |
| Surface Area               | 2174.048 m <sup>2</sup> /g | 2.80918e-02       | 503.1603     | 4.5962e-02          |
|                            |                            | 4.11628e-02       | 512.1458     | 6.7068e-02          |

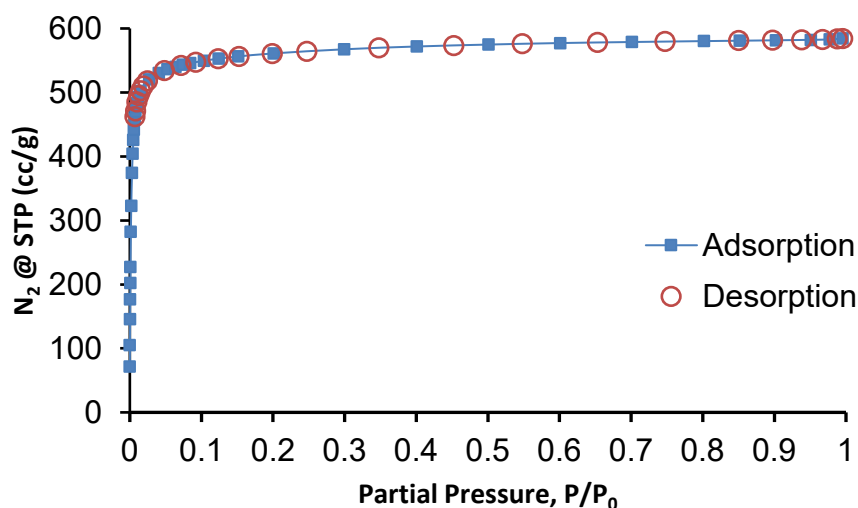

Figure S 56 Isotherm of WUF-44-22.

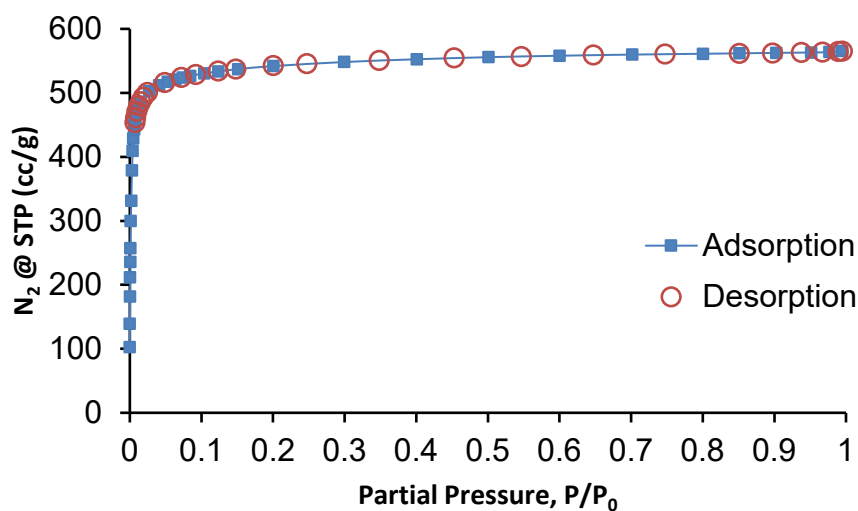

Figure S 57 Isotherm of WUF-44-22PSM.

| BET summary                | WUF-44-22                  | Relative Pressure | Volume @ STP | 1 /   W((Po/P) - 1) |
|----------------------------|----------------------------|-------------------|--------------|---------------------|
|                            |                            | 8.10857e-03       | 469.9810     | 1.3917e-02          |
| Slope                      | 1.537                      | 9.00353e-03       | 477.6244     | 1.5220e-02          |
| Intercept                  | 1.328e-03                  | 1.00193e-02       | 483.6480     | 1.6743e-02          |
| Correlation coefficient, r | 0.999983                   | 1.20765e-02       | 492.7429     | 1.9849e-02          |
| C constant                 | 1158.891                   | 1.51039e-02       | 502.2813     | 2.4429e-02          |
| Surface Area               | 2263.659 m <sup>2</sup> /g | 2.70788e-02       | 520.3263     | 4.2798e-02          |
|                            |                            | 4.08067e-02       | 530.4648     | 6.4168e-02          |

| BET summary                | WUF-44-22PSM               | Relative Pressure | Volume @ STP | 1 /   W((Po/P) - 1) |
|----------------------------|----------------------------|-------------------|--------------|---------------------|
|                            |                            | 8.12115e-03       | 460.7094     | 1.4219e-02          |
| Slope                      | 1.600                      | 9.05462e-03       | 466.2495     | 1.5680e-02          |
| Intercept                  | 1.152e-03                  | 9.98833e-03       | 470.6442     | 1.7152e-02          |
| Correlation coefficient, r | 0.999993                   | 1.20737e-02       | 478.0566     | 2.0454e-02          |
| C constant                 | 1389.884                   | 1.50141e-02       | 485.5706     | 2.5117e-02          |
| Surface Area               | 2174.491 m <sup>2</sup> /g | 2.74088e-02       | 502.2737     | 4.4892e-02          |
|                            |                            | 4.10757e-02       | 511.7205     | 6.6976e-02          |

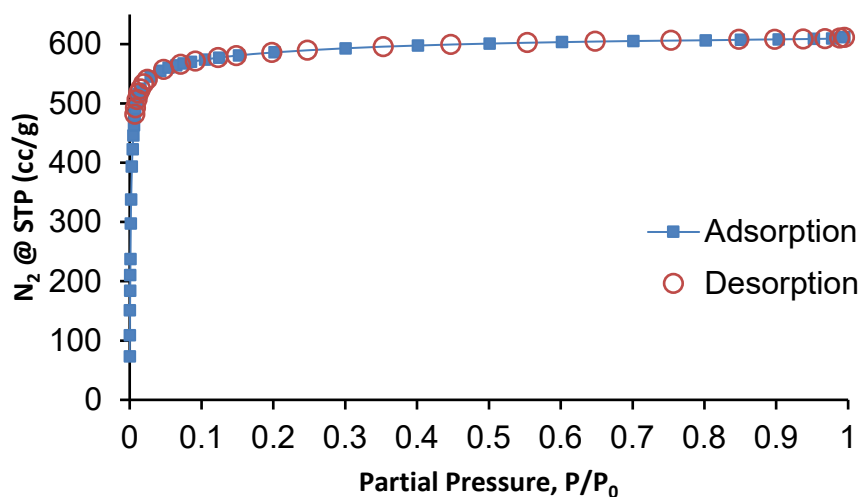

Figure S 58 Isotherm of WUF-44-13.

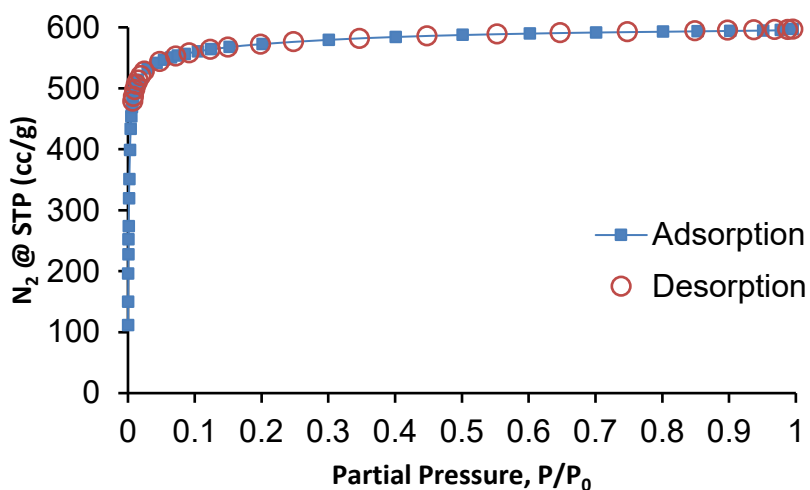

Figure S 59 Isotherm of WUF-44-13PSM.

| BET summary                | WUF-44-13                  | Relative Pressure | Volume @ STP | 1 /   W((Po/P) - 1) |
|----------------------------|----------------------------|-------------------|--------------|---------------------|
|                            |                            | 8.02657e-03       | 491.4879     | 1.3172e-02          |
| Slope                      | 1.475                      | 9.04756e-03       | 499.7826     | 1.4617e-02          |
| Intercept                  | 1.214e-03                  | 9.99161e-03       | 505.7598     | 1.5966e-02          |
| Correlation coefficient, r | 0.999983                   | 1.21072e-02       | 515.5884     | 1.9019e-02          |
| C constant                 | 1215.914                   | 1.50985e-02       | 524.9823     | 2.3364e-02          |
| Surface Area               | 2359.630 m <sup>2</sup> /g | 2.90352e-02       | 545.3957     | 4.3869e-02          |
|                            |                            | 4.26486e-02       | 554.9351     | 6.4231e-02          |

| BET summary                | WUF-44-13PSM               | Relative Pressure | Volume @ STP | 1 /   W((Po/P) - 1) |
|----------------------------|----------------------------|-------------------|--------------|---------------------|
|                            |                            | 8.08400e-03       | 487.0586     | 1.3388e-02          |
| Slope                      | 1.517                      | 9.07299e-03       | 493.0475     | 1.4858e-02          |
| Intercept                  | 1.060e-03                  | 9.96137e-03       | 497.3771     | 1.6186e-02          |
| Correlation coefficient, r | 0.999992                   | 1.20899e-02       | 505.3842     | 1.9375e-02          |
| C constant                 | 1432.060                   | 1.51430e-02       | 513.4657     | 2.3959e-02          |
| Surface Area               | 2294.591 m <sup>2</sup> /g | 2.93866e-02       | 532.4042     | 4.5500e-02          |
|                            |                            | 4.27379e-02       | 541.4736     | 6.5971e-02          |

**Table S 4** Apparent BET Surface areas of the MOFs before and after dual modification.

| WUF Code                                            | BET <sub>SA</sub> (m <sup>2</sup> /g) |
|-----------------------------------------------------|---------------------------------------|
| Zn <sub>4</sub> O(L <sup>2</sup> ) <sub>3</sub>     | 2062*                                 |
| Zn <sub>4</sub> O(L <sup>2</sup> ) <sub>3</sub> PSM | 2103                                  |
| WUF-44-89                                           | 2018                                  |
| WUF-44-89PSM                                        | 2099                                  |
| WUF-44-82                                           | 2118                                  |
| WUF-44-82PSM                                        | 2149                                  |
| WUF-44-75                                           | 2021                                  |
| WUF-44-75PSM                                        | 2237                                  |
| WUF-44-65                                           | 2116                                  |
| WUF-44-65PSM                                        | 2117                                  |
| WUF-44-56                                           | 2236                                  |
| WUF-44-56PSM                                        | 2220                                  |
| WUF-44-47                                           | 2150                                  |
| WUF-44-47PSM                                        | 2181                                  |
| WUF-44-33                                           | 2160                                  |
| WUF-44-33PSM                                        | 2174                                  |
| WUF-44-22                                           | 2263                                  |
| WUF-44-22PSM                                        | 2174                                  |
| WUF-44-13                                           | 2359                                  |
| WUF-44-13PSM                                        | 2294                                  |
| WUF-35                                              | 2166#                                 |
| WUF-35PSM                                           | 2150#                                 |

\* We reported a value of 1999 m<sup>2</sup>/g in Bryant et al.<sup>3</sup> We re-prepared this sample during this study.

# We reported these values in Ablott et al.<sup>1</sup>

## 7 References

---

<sup>1</sup> T. A. Ablott, R. Webby, D. R. Jenkinson, A. Nikolich, L. Liu, H. Amer Hamzah, M. F. Mahon, A. D. Burrows and C. Richardson, *Inorg. Chem.*, 2022, **61**, 1136-1144.

<sup>2</sup> A. D. Burrows, S. O. Hunter, M. F. Mahon and C. Richardson, *Chem. Commun.*, 2013, **49**, 990-992.

<sup>3</sup> M. R. Bryant, T. Cunynghame, S. O. Hunter, S. G. Telfer and C. Richardson, *Inorg. Chem.*, 2021, **60**, 11711-11719.
